# Supplementary material for: Connecting Mutations of the RNA Polymerase II C-Terminal Domain to Complex Phenotypic Changes Using Combined Gene Expression and Network Analyses
Source: PubMed Central journal article supplement (PMC2894937; doi:10.1371/journal.pone.0011386), 2010-06-30
Supplement: pone.0011386.s006.pdf [file pone.0011386.s006.pdf]

| Gene Name | Alternate Gene Name | ORF    | Up + or Down - regulation | Gene Description                                                                                                                                                                                                                                |
|-----------|---------------------|--------|---------------------------|-------------------------------------------------------------------------------------------------------------------------------------------------------------------------------------------------------------------------------------------------|
| AAD14     |                     | YNL331 | -                         | Putative aryl-alcohol dehydrogenase with similarity to <i>P. chrysosporium</i> aryl-alcohol dehydrogenase; mutational analysis has not yet revealed a physiological role                                                                        |
| AAD15     |                     | YOL165 | -                         | Putative aryl-alcohol dehydrogenase with similarity to <i>P. chrysosporium</i> aryl-alcohol dehydrogenase; mutational analysis has not yet revealed a physiological role                                                                        |
| AAD3      |                     | YCR107 | -                         | Putative aryl-alcohol dehydrogenase with similarity to <i>P. chrysosporium</i> aryl-alcohol dehydrogenase; mutational analysis has not yet revealed a physiological role                                                                        |
| AAH1      |                     | YNL141 | -                         | Adenine deaminase (adenine aminohydrolase), involved in purine salvage and nitrogen catabolism                                                                                                                                                  |
| AAT1      |                     | YKL106 | +                         | Mitochondrial aspartate aminotransferase, catalyzes the conversion of oxaloacetate to aspartate in aspartate and asparagine biosynthesis                                                                                                        |
| ACC1      | ABP2 FAS3<br> MTR7  | YNR016 | -                         | Acetyl-CoA carboxylase, biotin containing enzyme that catalyzes the carboxylation of acetyl-CoA to form malonyl-CoA; required for de novo biosynthesis of long-chain fatty acids                                                                |
| ACO1      | GLU1                | YLR304 | -                         | Aconitase, required for the tricarboxylic acid (TCA) cycle and also independently required for mitochondrial genome maintenance; phosphorylated; component of the mitochondrial nucleoid; mutation leads to glutamate auxotrophy                |
| ACP1      |                     | YKL192 | +                         | Mitochondrial matrix acyl carrier protein, involved in biosynthesis of octanoate, which is a precursor to lipoic acid; activated by phosphopantetheinylation catalyzed by Ppt2p                                                                 |
| ADD37     |                     | YMR184 | +                         | Protein of unknown function involved in ER-associated protein degradation; green fluorescent protein (GFP)-fusion protein localizes to the cytoplasm and is induced in response to the DNA-damaging agent MMS; YMR184W is not an essential gene |
| ADD66     | PBA2 POC<br>2       | YKL206 | +                         | Protein involved in 20S proteasome assembly; forms a heterodimer with Pba1p that binds to proteasome precursors; similar to human PAC2 constituent of the PAC1-PAC2 complex involved in proteasome assembly                                     |
| ADE17     |                     | YMR120 | -                         | Enzyme of 'de novo' purine biosynthesis containing both 5-aminoimidazole-4-carboxamide ribonucleotide transformylase and inosine monophosphate cyclohydrolase activities, isozyme of Ade16p; ade16 ade17 mutants require adenine and histidine  |
| ADH1      | ADC1                | YOL086 | -                         | Alcohol dehydrogenase, fermentative isozyme active as homo- or heterotetramers; required for the reduction of acetaldehyde to ethanol, the last step in the glycolytic pathway                                                                  |
| ADH2      | ADR2                | YMR303 | -                         | Glucose-repressible alcohol dehydrogenase II, catalyzes the conversion of ethanol to acetaldehyde; involved in the production of certain carboxylate esters; regulated by ADR1                                                                  |
| ADH5      |                     | YBR145 | -                         | Alcohol dehydrogenase isoenzyme V; involved in ethanol production                                                                                                                                                                               |
| ADY4      |                     | YLR227 | -                         | Structural component of the meiotic outer plaque, which is a membrane-organizing center that assembles on the cytoplasmic face of the spindle pole body during meiosis II and triggers the formation of the prospore membrane                   |
| AGA1      |                     | YNR044 | -                         | Anchorage subunit of a-agglutinin of a-cells, highly O-glycosylated protein with N-terminal secretion signal and C-terminal signal for addition of GPI anchor to cell wall, linked to adhesion subunit Aga2p via two disulfide bonds            |
| AII       |                     | Q0050  | +                         | Reverse transcriptase required for splicing of the COX1 pre-mRNA, encoded by a mobile group II intron within the mitochondrial COX1 gene                                                                                                        |

| Gene Name | Alternate Gene Name | ORF    | Up + or Down - regulation | Gene Description                                                                                                                                                                                                                                                         |
|-----------|---------------------|--------|---------------------------|--------------------------------------------------------------------------------------------------------------------------------------------------------------------------------------------------------------------------------------------------------------------------|
| AI2       |                     | Q0055  | +                         | Reverse transcriptase required for splicing of the COX1 pre-mRNA, encoded by a mobile group II intron within the mitochondrial COX1 gene                                                                                                                                 |
| AI3       |                     | Q0060  | +                         | Endonuclease I-SceIII, encoded by a mobile group I intron within the mitochondrial COX1 gene                                                                                                                                                                             |
| AI4       |                     | Q0065  | +                         | Endonuclease I-SceII, encoded by a mobile group I intron within the mitochondrial COX1 gene; intron is normally spliced by the BI4p maturase but AI4p can mutate to acquire the same maturase activity                                                                   |
| AI5_ALPHA |                     | Q0070  | +                         | Endonuclease I-SceIV, involved in intron mobility; encoded by a mobile group I intron within the mitochondrial COX1 gene                                                                                                                                                 |
| AI5_BETA  |                     | Q0075  | +                         | Protein of unknown function, encoded within an intron of the mitochondrial COX1 gene; translational initiation codon is predicted to be ATA rather than ATG                                                                                                              |
| AIF1      | CPD1                | YNR074 | -                         | Mitochondrial cell death effector that translocates to the nucleus in response to apoptotic stimuli, homolog of mammalian Apoptosis-Inducing Factor, putative reductase                                                                                                  |
| AIM17     | FMP12               | YHL021 | -                         | Putative protein of unknown function; the authentic, non-tagged protein is detected in highly purified mitochondria in high-throughput studies; null mutant displays decreased frequency of mitochondrial genome loss (petite formation)                                 |
| AIM26     |                     | YKL037 | +                         | Putative protein of unknown function; null mutant is viable and displays increased frequency of mitochondrial genome loss (petite formation)                                                                                                                             |
| AIM29     |                     | YKR074 | +                         | Putative protein of unknown function; epitope-tagged protein localizes to the cytoplasm; null mutant displays increased frequency of mitochondrial genome loss (petite formation)                                                                                        |
| ALD6      | ALD1                | YPL061 | -                         | Cytosolic aldehyde dehydrogenase, activated by Mg <sup>2+</sup> and utilizes NADP <sup>+</sup> as the preferred coenzyme; required for conversion of acetaldehyde to acetate; constitutively expressed; locates to the mitochondrial outer surface upon oxidative stress |
| ALF1      |                     | YNL148 | -                         | Alpha-tubulin folding protein, similar to mammalian cofactor B; Alf1p-GFP localizes to cytoplasmic microtubules; required for the folding of alpha-tubulin and may play an additional role in microtubule maintenance                                                    |
| ALG3      | RHK1                | YBL082 | +                         | Dolichol-P-Man dependent alpha(1-3) mannosyltransferase, involved in the synthesis of dolichol-linked oligosaccharide donor for N-linked glycosylation of proteins                                                                                                       |
| ALY1      |                     | YKR021 | +                         | Putative protein of unknown function; green fluorescent protein (GFP)-fusion protein localizes to the cytoplasm                                                                                                                                                          |
| AMD1      | AMD3                | YML035 | -                         | AMP deaminase, tetrameric enzyme that catalyzes the deamination of AMP to form IMP and ammonia; may be involved in regulation of intracellular adenine nucleotide pools                                                                                                  |
| APM3      | YKS6                | YBR288 | +                         | Mu3-like subunit of the clathrin associated protein complex (AP-3); functions in transport of alkaline phosphatase to the vacuole via the alternate pathway                                                                                                              |
| APN1      |                     | YKL114 | +                         | Major apurinic/apyrimidinic endonuclease, 3'-repair diesterase involved in repair of DNA damage by oxidation and alkylating agents; also functions as a 3'-5' exonuclease to repair 7,8-dihydro-8-oxodeoxyguanosine                                                      |
| APQ12     |                     | YIL040 | +                         | Protein involved in nucleocytoplasmic transport of mRNA                                                                                                                                                                                                                  |

| Gene Name | Alternate Gene Name | ORF    | Up + or Down - regulation | Gene Description                                                                                                                                                                                                                                    |
|-----------|---------------------|--------|---------------------------|-----------------------------------------------------------------------------------------------------------------------------------------------------------------------------------------------------------------------------------------------------|
| AQY2      |                     | YLL052 | +                         | Water channel that mediates the transport of water across cell membranes, only expressed in proliferating cells, controlled by osmotic signals, may be involved in freeze tolerance; disrupted by a stop codon in many <i>S. cerevisiae</i> strains |
| ARA2      |                     | YMR041 | -                         | NAD-dependent arabinose dehydrogenase, involved in biosynthesis of erythroascorbic acid; similar to plant L-galactose dehydrogenase                                                                                                                 |
| ARG1      | ARG10               | YOL058 | +                         | Arginosuccinate synthetase, catalyzes the formation of L-argininosuccinate from citrulline and L-aspartate in the arginine biosynthesis pathway; potential Cdc28p substrate                                                                         |
| ARG3      |                     | YJL088 | +                         | Ornithine carbamoyltransferase (carbamoylphosphate:L-ornithine carbamoyltransferase), catalyzes the sixth step in the biosynthesis of the arginine precursor ornithine                                                                              |
| ARH1      |                     | YDR377 | +                         | Oxidoreductase of the mitochondrial inner membrane, involved in cytoplasmic and mitochondrial iron homeostasis and required for activity of Fe-S cluster-containing enzymes; one of the few mitochondrial proteins essential for viability          |
| ARN2      | TAF1                | YHL047 | -                         | Transporter, member of the ARN family of transporters that specifically recognize siderophore-iron chelates; responsible for uptake of iron bound to the siderophore triacetylfusarinine C                                                          |
| ARR1      | ACR1 YAP8           | YPR199 | -                         | Transcriptional activator of the bZIP family, required for transcription of genes involved in resistance to arsenic compounds                                                                                                                       |
| ARR2      | ACR2                | YPR200 | -                         | Arsenate reductase required for arsenate resistance; converts arsenate to arsenite which can then be exported from cells by Arr3p                                                                                                                   |
| ARR3      | ACR3                | YPR201 | -                         | Arsenite transporter of the plasma membrane, required for resistance to arsenic compounds; transcription is activated by Arr1p in the presence of arsenite                                                                                          |
| ASP3-2    | ASP3                | YLR157 | -                         | Cell-wall L-asparaginase II, involved in asparagine catabolism; expression is induced during nitrogen starvation; four copies of ASP3 are present in the genome reference strain S288C                                                              |
| ATG22     | AUT4                | YCL038 | +                         | Protein required for the breakdown of autophagic vesicles in the vacuole during autophagy, putative integral membrane protein that localizes to vacuolar membranes and punctate structures attached to the vacuole                                  |
| ATO3      |                     | YDR384 | -                         | Plasma membrane protein, regulation pattern suggests a possible role in export of ammonia from the cell; phosphorylated in mitochondria; member of the TC 9.B.33 YaaH family of putative transporters                                               |
| ATP15     | ATPEPSILON          | YPL271 | +                         | Epsilon subunit of the F1 sector of mitochondrial F1F0 ATP synthase, which is a large, evolutionarily conserved enzyme complex required for ATP synthesis; phosphorylated                                                                           |
| ATP17     |                     | YDR380 | +                         | Subunit f of the F0 sector of mitochondrial F1F0 ATP synthase, which is a large, evolutionarily conserved enzyme complex required for ATP synthesis                                                                                                 |
| ATP19     |                     | YOL077 | +                         | Subunit k of the mitochondrial F1F0 ATP synthase, which is a large enzyme complex required for ATP synthesis; associated only with the dimeric form of ATP synthase                                                                                 |
| ATP20     |                     | YPR020 | +                         | Subunit g of the mitochondrial F1F0 ATP synthase; reversibly phosphorylated on two residues; unphosphorylated form is required for dimerization of the ATP synthase complex                                                                         |
| ATP3      |                     | YBR039 | +                         | Gamma subunit of the F1 sector of mitochondrial F1F0 ATP synthase, which is a large, evolutionarily conserved enzyme complex required for ATP synthesis                                                                                             |

| Gene Name | Alternate Gene Name | ORF    | Up + or Down - regulation | Gene Description                                                                                                                                                                                                                                 |
|-----------|---------------------|--------|---------------------------|--------------------------------------------------------------------------------------------------------------------------------------------------------------------------------------------------------------------------------------------------|
| ATP5      | OSC1                | YDR298 | +                         | Subunit 5 of the stator stalk of mitochondrial F1F0 ATP synthase, which is an evolutionarily conserved enzyme complex required for ATP synthesis; homologous to bovine subunit OSCP (oligomycin sensitivity-conferring protein); phosphorylated  |
| ATP6      | OLI2 OLI4 PHO1      | Q0085  | +                         | Mitochondrially encoded subunit 6 of the F0 sector of mitochondrial F1F0 ATP synthase, which is a large, evolutionarily conserved enzyme complex required for ATP synthesis                                                                      |
| ATP7      |                     | YKL016 | +                         | Subunit d of the stator stalk of mitochondrial F1F0 ATP synthase, which is a large, evolutionarily conserved enzyme complex required for ATP synthesis                                                                                           |
| ATP8      | AAP1                | Q0080  | +                         | Subunit 8 of the F0 sector of mitochondrial inner membrane F1-F0 ATP synthase, encoded on the mitochondrial genome                                                                                                                               |
| AVT7      |                     | YIL088 | -                         | Putative transporter, member of a family of seven <i>S. cerevisiae</i> genes (AVT1-7) related to vesicular GABA-glycine transporters                                                                                                             |
| AYT1      |                     | YLL063 | -                         | Acetyltransferase; catalyzes trichothecene 3-O-acetylation, suggesting a possible role in trichothecene biosynthesis                                                                                                                             |
| AZR1      |                     | YGR224 | +                         | Plasma membrane transporter of the major facilitator superfamily, involved in resistance to azole drugs such as ketoconazole and fluconazole                                                                                                     |
| BAR1      | SST1                | YIL015 | -                         | Aspartyl protease secreted into the periplasmic space of mating type a cells, helps cells find mating partners, cleaves and inactivates alpha factor allowing cells to recover from alpha-factor-induced cell cycle arrest                       |
| BAS1      |                     | YKR099 | +                         | Myb-related transcription factor involved in regulating basal and induced expression of genes of the purine and histidine biosynthesis pathways; also involved in regulation of meiotic recombination at specific genes                          |
| BCH2      | FMP50               | YKR027 | +                         | Member of the ChAPs family of proteins (Chs5p-Arf1p-binding proteins: Bch1p, Bch2p, Bud7p, Chs6p), that forms the exomer complex with Chs5p to mediate export of specific cargo proteins, including Chs3p, from the Golgi to the plasma membrane |
| BDH2      |                     | YAL061 | -                         | Zeta subunit of the oligosaccharyltransferase complex of the ER lumen, which catalyzes asparagine-linked glycosylation of newly synthesized proteins                                                                                             |
| BDS1      |                     | YOL164 | -                         | Bacterially-derived sulfatase required for use of alkyl- and aryl-sulfates as sulfur sources                                                                                                                                                     |
| BET3      |                     | YKR068 | +                         | Hydrophilic protein that acts in conjunction with SNARE proteins in targeting and fusion of ER to Golgi transport vesicles; component of the TRAPP (transport protein particle) complex                                                          |
| BGL2      |                     | YGR282 | +                         | Endo-beta-1,3-glucanase, major protein of the cell wall, involved in cell wall maintenance                                                                                                                                                       |
| BI2       |                     | Q0110  | -                         | Mitochondrial mRNA maturase with a role in splicing, encoded by both exon and intron sequences of partially processed COB mRNA                                                                                                                   |
| BI3       |                     | Q0115  | -                         | Mitochondrial mRNA maturase, forms a complex with Mrs1p to mediate splicing of the bI3 intron of the COB gene; encoded by both exon and intron sequences of partially processed COB mRNA                                                         |
| BIO3      |                     | YNR058 | +                         | 7,8-diamino-pelargonic acid aminotransferase (DAPA), catalyzes the second step in the biotin biosynthesis pathway; BIO3 is in a cluster of 3 genes (BIO3, BIO4, and BIO5) that mediate biotin synthesis                                          |

| Gene Name | Alternate Gene Name | ORF    | Up + or Down - regulation | Gene Description                                                                                                                                                                                                                                           |
|-----------|---------------------|--------|---------------------------|------------------------------------------------------------------------------------------------------------------------------------------------------------------------------------------------------------------------------------------------------------|
| BIO5      |                     | YNR056 | +                         | Putative transmembrane protein involved in the biotin biosynthesis pathway; responsible for uptake of 7-keto 8-aminopelargonic acid; BIO5 is in a cluster of 3 genes (BIO3, BIO4, and BIO5) that mediate biotin synthesis                                  |
| BNA1      | HAD1                | YJR025 | -                         | 3-hydroxyanthranilic acid dioxygenase, required for biosynthesis of nicotinic acid from tryptophan via kynurenine pathway                                                                                                                                  |
| BNA4      |                     | YBL098 | -                         | Kynurenine 3-mono oxygenase, required for biosynthesis of nicotinic acid from tryptophan via kynurenine pathway                                                                                                                                            |
| BNA5      |                     | YLR231 | -                         | Kynureninase, required for biosynthesis of nicotinic acid from tryptophan via kynurenine pathway                                                                                                                                                           |
| BNA6      | QPT1                | YFR047 | -                         | Quinolate phosphoribosyl transferase, required for biosynthesis of nicotinic acid from tryptophan via kynurenine pathway                                                                                                                                   |
| BOP2      |                     | YLR267 | -                         | Protein of unknown function, overproduction suppresses a pam1 slv3 double null mutation                                                                                                                                                                    |
| BOR1      |                     | YNL275 | -                         | Boron efflux transporter of the plasma membrane; binds HCO <sub>3</sub> <sup>-</sup> , I <sup>-</sup> , Br <sup>-</sup> , NO <sub>3</sub> <sup>-</sup> and Cl <sup>-</sup> ; has similarity to the characterized boron efflux transporter A. thaliana BOR1 |
| BSC3      |                     | YLR465 | -                         | Dubious open reading frame, unlikely to encode a protein; not conserved in closely related Saccharomyces species; 100% of YLR465C overlaps the uncharacterized ORF YLR464W and 86% of YLR465C overlaps the verified gene YRF1-4                            |
| BSC5      |                     | YNR069 | -                         | Protein of unknown function, ORF exhibits genomic organization compatible with a translational readthrough-dependent mode of expression                                                                                                                    |
| BSC6      |                     | YOL137 | +                         | Protein of unknown function containing 8 putative transmembrane segments; ORF exhibits genomic organization compatible with a translational readthrough-dependent mode of expression                                                                       |
| BUB1      |                     | YGR188 | +                         | Protein kinase that forms a complex with Mad1p and Bub3p that is crucial in the checkpoint mechanism required to prevent cell cycle progression into anaphase in the presence of spindle damage, associates with centromere DNA via Skp1p                  |
| BUD19     |                     | YJL188 | +                         | Dubious open reading frame, unlikely to encode a protein; not conserved in closely related Saccharomyces species; 88% of ORF overlaps the verified gene RPL39; diploid mutant displays a weak budding pattern phenotype in a systematic assay              |
| BUD26     |                     | YDR241 | +                         | Dubious open reading frame, unlikely to encode a protein; not conserved in closely related Saccharomyces species; 1% of ORF overlaps the verified gene SNU56; diploid mutant displays a weak budding pattern phenotype in a systematic assay               |
| BUR6      | NCB1                | YER159 | -                         | Subunit of a heterodimeric NC2 transcription regulator complex with Ncb2p; complex binds to TBP and can repress transcription by preventing preinitiation complex assembly or stimulate activated transcription; homologous to human NC2alpha              |
| CAF17     | IBA57               | YJR122 | -                         | Mitochondrial matrix protein involved in the incorporation of iron-sulfur clusters into mitochondrial aconitase-type proteins; activates the radical-SAM family members Bio2p and Lip5p; interacts with Ccr4p in the two-hybrid system                     |
| CAF20     | CAF2 CAP20          | YOR276 | +                         | Phosphoprotein of the mRNA cap-binding complex involved in translational control, repressor of cap-dependent translation initiation, competes with eIF4G for binding to eIF4E                                                                              |

| Gene Name | Alternate Gene Name | ORF    | Up + or Down - regulation | Gene Description                                                                                                                                                                                                                                 |
|-----------|---------------------|--------|---------------------------|--------------------------------------------------------------------------------------------------------------------------------------------------------------------------------------------------------------------------------------------------|
| CAF4      |                     | YKR036 | +                         | WD40 repeat-containing protein associated with the CCR4-NOT complex, interacts in a Ccr4p-dependent manner with Ssn2p; also interacts with Fis1p, Mdv1p and Dnm1p and plays a role in mitochondrial fission                                      |
| CAP1      |                     | YKL007 | -                         | Alpha subunit of the capping protein (CP) heterodimer (Cap1p and Cap2p) which binds to the barbed ends of actin filaments preventing further polymerization; localized predominantly to cortical actin patches                                   |
| CAT2      | YCAT                | YML042 | -                         | Carnitine acetyl-CoA transferase present in both mitochondria and peroxisomes, transfers activated acetyl groups to carnitine to form acetylcarnitine which can be shuttled across membranes                                                     |
| CAT8      | DIL1 MSP8           | YMR280 | -                         | Zinc cluster transcriptional activator necessary for derepression of a variety of genes under non-fermentative growth conditions, active after diauxic shift, binds carbon source responsive elements                                            |
| CCC2      |                     | YDR270 | -                         | Cu(+2)-transporting P-type ATPase, required for export of copper from the cytosol into an extracytosolic compartment; has similarity to human proteins involved in Menkes and Wilsons diseases                                                   |
| CCH1      |                     | YGR217 | +                         | Voltage-gated high-affinity calcium channel involved in calcium influx in response to some environmental stresses as well as exposure to mating pheromones; interacts and co-localizes with Mid1p, suggesting Cch1p and Mid1p function together  |
| CCP1      |                     | YKR066 | +                         | Mitochondrial cytochrome-c peroxidase; degrades reactive oxygen species in mitochondria, involved in the response to oxidative stress                                                                                                            |
| CDC16     |                     | YKL022 | +                         | Subunit of the anaphase-promoting complex/cyclosome (APC/C), which is a ubiquitin-protein ligase required for degradation of anaphase inhibitors, including mitotic cyclins, during the metaphase/anaphase transition; required for sporulation  |
| CDC36     | DNA19 NO T2         | YDL165 | +                         | Component of the CCR4-NOT complex, which has multiple roles in regulating mRNA levels including regulation of transcription and destabilizing mRNAs by deadenylation; basal transcription factor                                                 |
| CFT1      | YHH1                | YDR301 | -                         | RNA-binding subunit of the mRNA cleavage and polyadenylation factor; involved in poly(A) site recognition and required for both pre-mRNA cleavage and polyadenylation, 51% sequence similarity with mammalian AAUAA-binding subunit of CPSF      |
| CHA1      |                     | YCL064 | -                         | Catabolic L-serine (L-threonine) deaminase, catalyzes the degradation of both L-serine and L-threonine; required to use serine or threonine as the sole nitrogen source, transcriptionally induced by serine and threonine                       |
| CHS6      | CSD3                | YJL099 | +                         | Member of the ChAPs family of proteins (Chs5p-Arf1p-binding proteins: Bch1p, Bch2p, Bud7p, Chs6p), that forms the exomer complex with Chs5p to mediate export of specific cargo proteins, including Chs3p, from the Golgi to the plasma membrane |
| CIS1      | ATG31               | YDR022 | -                         | Protein required for autophagosome formation in concert with Atg17p; may be involved in microtubule organization; high-copy suppressor of CIK1 deletion                                                                                          |
| CLB6      |                     | YGR109 | -                         | B-type cyclin involved in DNA replication during S phase; activates Cdc28p to promote initiation of DNA synthesis; functions in formation of mitotic spindles along with Clb3p and Clb4p; most abundant during late G1                           |
| COS1      |                     | YNL336 | -                         | Protein of unknown function, member of the DUP380 subfamily of conserved, often subtelomerically-encoded proteins                                                                                                                                |

| Gene Name | Alternate Gene Name | ORF    | Up + or Down - regulation | Gene Description                                                                                                                                                                                                                         |
|-----------|---------------------|--------|---------------------------|------------------------------------------------------------------------------------------------------------------------------------------------------------------------------------------------------------------------------------------|
| COS10     |                     | YNR075 | -                         | Protein of unknown function, member of the DUP380 subfamily of conserved, often subtelomerically-encoded proteins                                                                                                                        |
| COS12     |                     | YGL263 | -                         | Protein of unknown function, member of the DUP380 subfamily of conserved, often subtelomerically-encoded proteins                                                                                                                        |
| COS6      |                     | YGR295 | -                         | Protein of unknown function, member of the DUP380 subfamily of conserved, often subtelomerically-encoded proteins                                                                                                                        |
| COS7      |                     | YDL248 | -                         | Protein of unknown function, member of the DUP380 subfamily of conserved, often subtelomerically-encoded proteins; the authentic, non-tagged protein is detected in highly purified mitochondria in high-throughput studies              |
| COS8      |                     | YHL048 | -                         | Nuclear membrane protein, member of the DUP380 subfamily of conserved, often subtelomerically-encoded proteins; regulation suggests a potential role in the unfolded protein response                                                    |
| COX1      | OXI3                | Q0045  | +                         | Subunit I of cytochrome c oxidase, which is the terminal member of the mitochondrial inner membrane electron transport chain; one of three mitochondrially-encoded subunits                                                              |
| COX2      | OXI1 OXII           | Q0250  | +                         | Subunit II of cytochrome c oxidase, which is the terminal member of the mitochondrial inner membrane electron transport chain; one of three mitochondrially-encoded subunits                                                             |
| COX7      |                     | YMR256 | +                         | Subunit VII of cytochrome c oxidase, which is the terminal member of the mitochondrial inner membrane electron transport chain                                                                                                           |
| COX8      |                     | YLR395 | +                         | Subunit VIII of cytochrome c oxidase, which is the terminal member of the mitochondrial inner membrane electron transport chain                                                                                                          |
| CRC1      |                     | YOR100 | -                         | Mitochondrial inner membrane carnitine transporter, required for carnitine-dependent transport of acetyl-CoA from peroxisomes to mitochondria during fatty acid beta-oxidation                                                           |
| CRG1      |                     | YHR209 | +                         | Putative S-adenosylmethionine-dependent methyltransferase; mediates cantharidin resistance                                                                                                                                               |
| CSE4      | CSL2                | YKL049 | +                         | Centromere protein that resembles histones, required for proper kinetochore function; homolog of human CENP-A                                                                                                                            |
| CUP1-2    | CUP1                | YHR055 | +                         | Metallothionein, binds copper and mediates resistance to high concentrations of copper and cadmium; locus is variably amplified in different strains, with two copies, CUP1-1 and CUP1-2, in the genomic sequence reference strain S288C |
| CWP1      | YJU1                | YKL096 | +                         | Cell wall mannoprotein, linked to a beta-1,3- and beta-1,6-glucan heteropolymer through a phosphodiester bond; involved in cell wall organization                                                                                        |
| CWP2      | LPR1 YKL097W-A      | YKL096 | +                         | Covalently linked cell wall mannoprotein, major constituent of the cell wall; plays a role in stabilizing the cell wall; involved in low pH resistance; precursor is GPI-anchored                                                        |
| DAD2      | HSK1                | YKR083 | +                         | Essential subunit of the Dam1 complex (aka DASH complex), couples kinetochores to the force produced by MT depolymerization thereby aiding in chromosome segregation; is transferred to the kinetochore prior to mitosis                 |
| DAK2      |                     | YFL053 | +                         | Dihydroxyacetone kinase, required for detoxification of dihydroxyacetone (DHA); involved in stress adaptation                                                                                                                            |

| Gene Name | Alternate Gene Name            | ORF    | Up + or Down - regulation | Gene Description                                                                                                                                                                                                                                |
|-----------|--------------------------------|--------|---------------------------|-------------------------------------------------------------------------------------------------------------------------------------------------------------------------------------------------------------------------------------------------|
| DAL2      | ALC1                           | YIR029 | -                         | Allantoicase, converts allantoate to urea and ureidoglycolate in the second step of allantoin degradation; expression sensitive to nitrogen catabolite repression and induced by allophanate, an intermediate in allantoin degradation          |
| DAN3      |                                | YBR301 | -                         | Cell wall mannoprotein with similarity to Tir1p, Tir2p, Tir3p, and Tir4p; expressed under anaerobic conditions, completely repressed during aerobic growth                                                                                      |
| DCG1      |                                | YIR030 | -                         | Protein of unknown function, expression is sensitive to nitrogen catabolite repression and regulated by Dal80p; contains transmembrane domain                                                                                                   |
| DCW1      |                                | YKL046 | +                         | Putative mannosidase, GPI-anchored membrane protein required for cell wall biosynthesis in bud formation; homologous to Dfg5p                                                                                                                   |
| DDI2      |                                | YFL061 | -                         | Protein whose expression is induced by DNA damage                                                                                                                                                                                               |
| DIA3      |                                | YDL024 | -                         | Protein of unknown function, involved in invasive and pseudohyphal growth                                                                                                                                                                       |
| DIC1      |                                | YLR348 | -                         | Mitochondrial dicarboxylate carrier, integral membrane protein, catalyzes a dicarboxylate-phosphate exchange across the inner mitochondrial membrane, transports cytoplasmic dicarboxylates into the mitochondrial matrix                       |
| DID4      | CHM2 GRD7 REN1 VPL2 VPS2 VPT14 | YKL002 | +                         | Class E Vps protein of the ESCRT-III complex, required for sorting of integral membrane proteins into luminal vesicles of multivesicular bodies, and for delivery of newly synthesized vacuolar enzymes to the vacuole, involved in endocytosis |
| DIT1      |                                | YDR403 | -                         | Sporulation-specific enzyme required for spore wall maturation, involved in the production of a soluble LL-dityrosine-containing precursor of the spore wall; transcripts accumulate at the time of prospore enclosure                          |
| DLD3      |                                | YEL071 | -                         | D-lactate dehydrogenase, part of the retrograde regulon which consists of genes whose expression is stimulated by damage to mitochondria and reduced in cells grown with glutamate as the sole nitrogen source, located in the cytoplasm        |
| DNF1      |                                | YER166 | +                         | Aminophospholipid translocase (flippase) that localizes primarily to the plasma membrane; contributes to endocytosis, protein transport and cell polarity; type 4 P-type ATPase                                                                 |
| DRE2      |                                | YKR071 | +                         | Protein of unknown function; mutation displays synthetic lethal interaction with the pol3-13 allele of CDC2                                                                                                                                     |
| EBP2      |                                | YKL172 | -                         | Essential protein required for the maturation of 25S rRNA and 60S ribosomal subunit assembly, localizes to the nucleolus; constituent of 66S pre-ribosomal particles                                                                            |
| ECI1      |                                | YLR284 | -                         | Peroxisomal delta3,delta2-enoyl-CoA isomerase, hexameric protein that converts 3-hexenoyl-CoA to trans-2-hexenoyl-CoA, essential for the beta-oxidation of unsaturated fatty acids, oleate-induced                                              |
| ECM18     |                                | YDR125 | -                         | Protein of unknown function, similar to Rlp24p                                                                                                                                                                                                  |
| ECM21     |                                | YBL101 | -                         | Non-essential protein of unknown function; promoter contains several Gcn4p binding elements                                                                                                                                                     |
| ECM7      | ZRG15                          | YLR443 | +                         | Non-essential protein of unknown function                                                                                                                                                                                                       |
| ELF1      |                                | YKL160 | +                         | Transcription elongation factor that contains a conserved zinc finger domain; implicated in the maintenance of proper chromatin structure in actively transcribed regions; deletion inhibits Brome mosaic virus (BMV) gene expression           |



| Gene Name | Alternate Gene Name | ORF    | Up + or Down - regulation | Gene Description                                                                                                                                                                                                                             |
|-----------|---------------------|--------|---------------------------|----------------------------------------------------------------------------------------------------------------------------------------------------------------------------------------------------------------------------------------------|
| ELP2      | TOT2                | YGR200 | -                         | Subunit of Elongator complex, which is required for modification of wobble nucleosides in tRNA; target of Kluyveromyces lactis zymocin                                                                                                       |
| EMP46     |                     | YLR080 | -                         | Integral membrane component of endoplasmic reticulum-derived COPII-coated vesicles, which function in ER to Golgi transport                                                                                                                  |
| EMP47     |                     | YFL048 | -                         | Integral membrane component of endoplasmic reticulum-derived COPII-coated vesicles, which function in ER to Golgi transport                                                                                                                  |
| ENA1      | HOR6 PMR<br>2       | YDR040 | -                         | P-type ATPase sodium pump, involved in Na <sup>+</sup> and Li <sup>+</sup> efflux to allow salt tolerance                                                                                                                                    |
| ENA2      |                     | YDR039 | -                         | P-type ATPase sodium pump, involved in Na <sup>+</sup> efflux to allow salt tolerance; likely not involved in Li <sup>+</sup> efflux                                                                                                         |
| ERD1      | LDB2                | YDR414 | -                         | Predicted membrane protein required for the retention of luminal endoplasmic reticulum proteins; mutants secrete the endogenous ER protein, BiP (Kar2p)                                                                                      |
| ERO1      |                     | YML130 | +                         | Thiol oxidase required for oxidative protein folding in the endoplasmic reticulum                                                                                                                                                            |
| ERR1      |                     | YOR393 | -                         | Protein of unknown function, has similarity to enolases                                                                                                                                                                                      |
| ERR2      |                     | YPL281 | -                         | Protein of unknown function, has similarity to enolases                                                                                                                                                                                      |
| ERR3      |                     | YMR323 | -                         | Protein of unknown function, has similarity to enolases                                                                                                                                                                                      |
| ERV15     |                     | YBR210 | +                         | Protein involved in export of proteins from the endoplasmic reticulum, has similarity to Erv14p                                                                                                                                              |
| ESF1      |                     | YDR365 | -                         | Nucleolar protein involved in pre-rRNA processing; depletion causes severely decreased 18S rRNA levels                                                                                                                                       |
| EST2      | TERT                | YLR318 | -                         | Reverse transcriptase subunit of the telomerase holoenzyme, essential for telomerase core catalytic activity, involved in other aspects of telomerase assembly and function; mutations in human homolog are associated with aplastic anemia  |
| EXG2      |                     | YDR261 | -                         | Exo-1,3-beta-glucanase, involved in cell wall beta-glucan assembly; may be anchored to the plasma membrane via a glycosylphosphatidylinositol (GPI) anchor                                                                                   |
| EXG2      |                     | YDR261 | -                         | Exo-1,3-beta-glucanase, involved in cell wall beta-glucan assembly; may be anchored to the plasma membrane via a glycosylphosphatidylinositol (GPI) anchor                                                                                   |
| FAR1      |                     | YJL157 | -                         | Cyclin-dependent kinase inhibitor that mediates cell cycle arrest in response to pheromone; also forms a complex with Cdc24p, Ste4p, and Ste18p that may specify the direction of polarized growth during mating; potential Cdc28p substrate |
| FAR10     |                     | YLR238 | -                         | Protein involved in G1 cell cycle arrest in response to pheromone, in a pathway different from the Far1p-dependent pathway; interacts with Far3p, Far7p, Far8p, Far9p, and Far11p; potential Cdc28p substrate                                |
| FAR3      |                     | YMR052 | -                         | Protein involved in G1 cell cycle arrest in response to pheromone, in a pathway different from the Far1p-dependent pathway; interacts with Far7p, Far8p, Far9p, Far10p, and Far11p                                                           |
| FIG1      |                     | YBR040 | -                         | Integral membrane protein required for efficient mating; may participate in or regulate the low affinity Ca <sup>2+</sup> influx system, which affects intracellular signaling and cell-cell fusion during mating                            |
| FLO10     |                     | YKR102 | +                         | Lectin-like protein with similarity to Flo1p, thought to be involved in flocculation                                                                                                                                                         |
| FLO8      | PHD5 YER<br>108C    | YER109 | +                         | Transcription factor required for flocculation, diploid filamentous growth, and haploid invasive growth; genome reference strain S288C and most laboratory strains have a mutation in this gene                                              |

| Gene Name | Alternate Gene Name | ORF    | Up + or Down - regulation | Gene Description                                                                                                                                                                                                                   |
|-----------|---------------------|--------|---------------------------|------------------------------------------------------------------------------------------------------------------------------------------------------------------------------------------------------------------------------------|
| FLR1      |                     | YBR008 | +                         | Plasma membrane multidrug transporter of the major facilitator superfamily, involved in efflux of fluconazole, diazaborine, benomyl, methotrexate, and other drugs                                                                 |
| FMP10     |                     | YER182 | -                         | Putative protein of unknown function; the authentic, non-tagged protein is detected in highly purified mitochondria in high-throughput studies                                                                                     |
| FMP48     |                     | YGR052 | +                         | Putative protein of unknown function; the authentic, non-tagged protein is detected in highly purified mitochondria in high-throughput studies                                                                                     |
| FMS1      |                     | YMR020 | -                         | Polyamine oxidase, converts spermine to spermidine, which is required for the essential hypusination modification of translation factor eIF-5A; also involved in pantothenic acid biosynthesis                                     |
| FMT1      |                     | YBL013 | -                         | Methionyl-tRNA formyltransferase, catalyzes the formylation of initiator Met-tRNA in mitochondria; potential Cdc28p substrate                                                                                                      |
| FRE2      |                     | YKL220 | +                         | Ferric reductase and cupric reductase, reduces siderophore-bound iron and oxidized copper prior to uptake by transporters; expression induced by low iron levels but not by low copper levels                                      |
| FRE4      |                     | YNR060 | -                         | Ferric reductase, reduces a specific subset of siderophore-bound iron prior to uptake by transporters; expression induced by low iron levels                                                                                       |
| FSH1      |                     | YHR049 | +                         | Serine hydrolase that localizes to both the nucleus and cytoplasm; sequence is similar to Fsh2p and Fsh3p                                                                                                                          |
| FUR4      |                     | YBR021 | +                         | Uracil permease, localized to the plasma membrane; expression is tightly regulated by uracil levels and environmental cues                                                                                                         |
| FUS1      |                     | YCL027 | -                         | Membrane protein localized to the shmoo tip, required for cell fusion; expression regulated by mating pheromone; proposed to coordinate signaling, fusion, and polarization events required for fusion; potential Cdc28p substrate |
| FUS2      |                     | YMR232 | +                         | Cytoplasmic protein localized to the shmoo tip; required for the alignment of parental nuclei before nuclear fusion during mating                                                                                                  |
| FYV1      |                     | YDR024 | +                         | Dubious open reading frame, unlikely to encode a protein; not conserved in closely related Saccharomyces species; mutation decreases survival upon exposure to K1 killer toxin                                                     |
| FYV12     |                     | YOR183 | +                         | Protein of unknown function, required for survival upon exposure to K1 killer toxin                                                                                                                                                |
| GAL1      |                     | YBR020 | +                         | Galactokinase, phosphorylates alpha-D-galactose to alpha-D-galactose-1-phosphate in the first step of galactose catabolism; expression regulated by Gal4p                                                                          |
| GAL10     |                     | YBR019 | -                         | UDP-glucose-4-epimerase, catalyzes the interconversion of UDP-galactose and UDP-D-glucose in galactose metabolism; also catalyzes the conversion of alpha-D-glucose or alpha-D-galactose to their beta-anomers                     |
| GAL3      |                     | YDR009 | -                         | Transcriptional regulator involved in activation of the GAL genes in response to galactose; forms a complex with Gal80p to relieve Gal80p inhibition of Gal4p; binds galactose and ATP but does not have galactokinase activity    |
| GAL4      | GAL81               | YPL248 | -                         | DNA-binding transcription factor required for the activation of the GAL genes in response to galactose; repressed by Gal80p and activated by Gal3p                                                                                 |
| GAL7      |                     | YBR018 | -                         | Galactose-1-phosphate uridyl transferase, synthesizes glucose-1-phosphate and UDP-galactose from UDP-D-glucose and alpha-D-galactose-1-phosphate in the second step of galactose catabolism                                        |
| GAS5      |                     | YOL030 | +                         | 1,3-beta-glucanosyltransferase, has similarity to Gas1p; localizes to the cell wall                                                                                                                                                |

| Gene Name | Alternate Gene Name | ORF    | Up + or Down - regulation | Gene Description                                                                                                                                                                                                                               |
|-----------|---------------------|--------|---------------------------|------------------------------------------------------------------------------------------------------------------------------------------------------------------------------------------------------------------------------------------------|
| GCN4      | AAS3 ARG9           | YEL009 | +                         | Transcriptional activator of amino acid biosynthetic genes in response to amino acid starvation; expression is tightly regulated at both the transcriptional and translational levels                                                          |
| GCR2      |                     | YNL199 | -                         | Transcriptional activator of genes involved in glycolysis; interacts and functions with the DNA-binding protein Gcr1p                                                                                                                          |
| GCV3      |                     | YAL044 | +                         | H subunit of the mitochondrial glycine decarboxylase complex, required for the catabolism of glycine to 5,10-methylene-THF; expression is regulated by levels of levels of 5,10-methylene-THF in the cytoplasm                                 |
| GDH3      | FUN51               | YAL062 | -                         | NADP(+)-dependent glutamate dehydrogenase, synthesizes glutamate from ammonia and alpha-ketoglutarate; rate of alpha-ketoglutarate utilization differs from Gdh1p; expression regulated by nitrogen and carbon sources                         |
| GFA1      |                     | YKL104 | +                         | Glutamine-fructose-6-phosphate amidotransferase, catalyzes the formation of glucosamine-6-P and glutamate from fructose-6-P and glutamine in the first step of chitin biosynthesis                                                             |
| GIT1      |                     | YCR098 | -                         | Plasma membrane permease, mediates uptake of glycerophosphoinositol and glycerophosphocholine as sources of the nutrients inositol and phosphate; expression and transport rate are regulated by phosphate and inositol availability           |
| GLE2      | RAE1                | YER107 | -                         | Component of the nuclear pore complex required for polyadenylated RNA export but not for protein import, homologous to <i>S. pombe</i> Rae1p                                                                                                   |
| GLK1      | HOR3                | YCL040 | -                         | Glucokinase, catalyzes the phosphorylation of glucose at C6 in the first irreversible step of glucose metabolism; one of three glucose phosphorylating enzymes; expression regulated by non-fermentable carbon sources                         |
| GLO4      |                     | YOR040 | -                         | Mitochondrial glyoxalase II, catalyzes the hydrolysis of S-D-lactoylglutathione into glutathione and D-lactate                                                                                                                                 |
| GND2      |                     | YGR256 | -                         | 6-phosphogluconate dehydrogenase (decarboxylating), catalyzes an NADPH regenerating reaction in the pentose phosphate pathway; required for growth on D-glucono-delta-lactone                                                                  |
| GPD2      | GPD3                | YOL059 | -                         | NAD-dependent glycerol 3-phosphate dehydrogenase, homolog of Gpd1p, expression is controlled by an oxygen-independent signaling pathway required to regulate metabolism under anoxic conditions; located in cytosol and mitochondria           |
| GPI10     |                     | YGL142 | +                         | Integral membrane protein involved in glycosylphosphatidylinositol (GPI) anchor synthesis; putative alpha 1,2 mannosyltransferase required for addition of the third mannose onto the GPI core structure; human PIG-Bp is a functional homolog |
| GPI11     |                     | YDR302 | -                         | ER membrane protein involved in a late step of glycosylphosphatidylinositol (GPI) anchor assembly; involved in the addition of phosphoethanolamine to the multiply mannosylated GPI intermediate; human PIG-Fp is a functional homolog         |
| GPM2      |                     | YDL021 | -                         | Homolog of Gpm1p phosphoglycerate mutase which converts 3-phosphoglycerate to 2-phosphoglycerate in glycolysis; may be non-functional derivative of a gene duplication event                                                                   |
| GRC3      |                     | YLL035 | +                         | Protein of unknown function, required for cell growth and possibly involved in rRNA processing; mRNA is cell cycle regulated                                                                                                                   |
| GRX3      |                     | YDR098 | -                         | Hydroperoxide and superoxide-radical responsive glutathione-dependent oxidoreductase; monothiol glutaredoxin subfamily member along with Grx4p and Grx5p; protects cells from oxidative damage                                                 |

| Gene Name | Alternate Gene Name | ORF    | Up + or Down - regulation | Gene Description                                                                                                                                                                                                                                                         |
|-----------|---------------------|--------|---------------------------|--------------------------------------------------------------------------------------------------------------------------------------------------------------------------------------------------------------------------------------------------------------------------|
| HAP1      | CYP1                | YLR256 | -                         | Zinc finger transcription factor involved in the complex regulation of gene expression in response to levels of heme and oxygen; the S288C sequence differs from other strain backgrounds due to a Ty1 insertion in the carboxy terminus                                 |
| HCS1      | DIP1                | YKL017 | +                         | Hexameric DNA polymerase alpha-associated DNA helicase A involved in lagging strand DNA synthesis; contains single-stranded DNA stimulated ATPase and dATPase activities; replication protein A stimulates helicase and ATPase activities                                |
| HDA1      |                     | YNL021 | -                         | Putative catalytic subunit of a class II histone deacetylase complex that also contains Hda2p and Hda3p; Hda1p interacts with the Hda2p-Hda3p subcomplex to form an active tetramer; deletion increases histone H2B, H3 and H4 acetylation                               |
| HEF3      | ZRG7                | YNL014 | -                         | Translational elongation factor EF-3; paralog of YEF3 and member of the ABC superfamily; stimulates EF-1 alpha-dependent binding of aminoacyl-tRNA by the ribosome; normally expressed in zinc deficient cells                                                           |
| HEM12     | HEM6                | YDR047 | -                         | Uroporphyrinogen decarboxylase, catalyzes the fifth step in the heme biosynthetic pathway; localizes to both the cytoplasm and nucleus; activity inhibited by Cu <sup>2+</sup> , Zn <sup>2+</sup> , Fe <sup>2+</sup> , Fe <sup>3+</sup> and sulfhydryl-specific reagents |
| HEM2      | SLU1                | YGL040 | -                         | Delta-aminolevulinic acid dehydratase, a homo-octameric enzyme, catalyzes the conversion of delta-aminolevulinic acid to porphobilinogen, the second step in the heme biosynthetic pathway; localizes to both the cytoplasm and nucleus                                  |
| HEM4      | SLU2                | YOR278 | +                         | Uroporphyrinogen III synthase, catalyzes the conversion of hydroxymethylbilane to uroporphyrinogen III, the fourth step in the heme biosynthetic pathway                                                                                                                 |
| HGH1      |                     | YGR187 | -                         | Protein of unknown function with similarity to human HMG1 and HMG2; localizes to the cytoplasm                                                                                                                                                                           |
| HIT1      |                     | YJR055 | -                         | Protein of unknown function, required for growth at high temperature                                                                                                                                                                                                     |
| HOS1      |                     | YPR068 | -                         | Putative class I histone deacetylase (HDAC) with sequence similarity to Hda1p, Rpd3p, Hos2p, and Hos3p; deletion results in increased histone acetylation at rDNA repeats; interacts with the Tup1p-Ssn6p corepressor complex                                            |
| HPF1      |                     | YOL155 | +                         | Haze-protective mannoprotein that reduces the particle size of aggregated proteins in white wines                                                                                                                                                                        |
| HSL1      | NIK1                | YKL101 | +                         | Nim1p-related protein kinase that regulates the morphogenesis and septin checkpoints; associates with the assembled septin filament; required along with Hsl7p for bud neck recruitment, phosphorylation, and degradation of Swe1p                                       |
| HSP150    | CCW7 ORE1 PIR2      | YJL159 | +                         | O-mannosylated heat shock protein that is secreted and covalently attached to the cell wall via beta-1,3-glucan and disulfide bridges; required for cell wall stability; induced by heat shock, oxidative stress, and nitrogen limitation                                |
| HSP31     |                     | YDR533 | +                         | Possible chaperone and cysteine protease with similarity to E. coli Hsp31; member of the DJ-1/ThiJ/PfpI superfamily, which includes human DJ-1 involved in Parkinson's disease; exists as a dimer and contains a putative metal-binding site                             |
| HSP32     |                     | YPL280 | -                         | Possible chaperone and cysteine protease with similarity to E. coli Hsp31 and S. cerevisiae Hsp31p, Hsp33p, and Sno4p; member of the DJ-1/ThiJ/PfpI superfamily, which includes human DJ-1 involved in Parkinson's disease                                               |

| Gene Name | Alternate Gene Name | ORF    | Up + or Down - regulation | Gene Description                                                                                                                                                                                                                               |
|-----------|---------------------|--------|---------------------------|------------------------------------------------------------------------------------------------------------------------------------------------------------------------------------------------------------------------------------------------|
| HSP33     |                     | YOR391 | -                         | Enzyme of 'de novo' purine biosynthesis containing both 5-aminoimidazole-4-carboxamide ribonucleotide transformylase and inosine monophosphate cyclohydrolase activities, isozyme of Ade16p; ade16 ade17 mutants require adenine and histidine |
| HST4      |                     | YDR191 | -                         | Member of the Sir2 family of NAD(+)-dependent protein deacetylases; involved along with Hst3p in silencing at telomeres, cell cycle progression, radiation resistance, genomic stability and short-chain fatty acid metabolism                 |
| HTS1      | TSM4572             | YPR033 | -                         | Cytoplasmic and mitochondrial histidine tRNA synthetase; encoded by a single nuclear gene that specifies two messages; efficient mitochondrial localization requires both a presequence and an amino-terminal sequence                         |
| HUA2      |                     | YOR284 | -                         | Cytoplasmic protein of unknown function; computational analysis of large-scale protein-protein interaction data suggests a possible role in actin patch assembly                                                                               |
| HVG1      | YEM9                | YER039 | -                         | Protein of unknown function, has homology to Vrg4p                                                                                                                                                                                             |
| HXT13     |                     | YEL069 | +                         | Hexose transporter, induced in the presence of non-fermentable carbon sources, induced by low levels of glucose, repressed by high levels of glucose                                                                                           |
| HXT15     |                     | YDL245 | +                         | Protein of unknown function with similarity to hexose transporter family members, expression is induced by low levels of glucose and repressed by high levels of glucose                                                                       |
| HXT17     |                     | YNR072 | +                         | Hexose transporter, up-regulated in media containing raffinose and galactose at pH 7.7 versus pH 4.7, repressed by high levels of glucose                                                                                                      |
| ICY1      |                     | YMR195 | -                         | Protein of unknown function, required for viability in rich media of cells lacking mitochondrial DNA; mutants have an invasive growth defect with elongated morphology; induced by amino acid starvation                                       |
| IDH1      |                     | YNL037 | -                         | Subunit of mitochondrial NAD(+)-dependent isocitrate dehydrogenase, which catalyzes the oxidation of isocitrate to alpha-ketoglutarate in the TCA cycle                                                                                        |
| IML1      |                     | YJR138 | +                         | Protein of unknown function, green fluorescent protein (GFP)-fusion protein localizes to the vacuolar membrane                                                                                                                                 |
| IMP2'     | IMP2                | YIL154 | -                         | Transcriptional activator involved in maintenance of ion homeostasis and protection against DNA damage caused by bleomycin and other oxidants, contains a C-terminal leucine-rich repeat                                                       |
| IRC11     |                     | YOR013 | -                         | Hypothetical protein; null mutant displays increased levels of spontaneous Rad52 foci                                                                                                                                                          |
| IRC13     |                     | YOR235 | -                         | Hypothetical protein; null mutant displays increased levels of spontaneous Rad52 foci                                                                                                                                                          |
| IRC4      |                     | YDR540 | -                         | Hypothetical protein; null mutant displays increased levels of spontaneous Rad52 foci                                                                                                                                                          |
| ITR2      | HRB612              | YOL103 | -                         | Myo-inositol transporter with strong similarity to the major myo-inositol transporter Itr1p, member of the sugar transporter superfamily; expressed constitutively                                                                             |
| ITT1      |                     | YML068 | +                         | Protein that modulates the efficiency of translation termination, interacts with translation release factors eRF1 (Sup45p) and eRF3 (Sup35p) in vitro, contains a zinc finger domain characteristic of the TRIAD class of proteins             |
| IZH4      |                     | YOL101 | +                         | Membrane protein involved in zinc metabolism, member of the four-protein IZH family, expression induced by fatty acids and altered zinc levels; deletion reduces sensitivity to excess zinc; possible role in sterol metabolism                |

| Gene Name | Alternate Gene Name | ORF    | Up + or Down - regulation | Gene Description                                                                                                                                                                                                                                |
|-----------|---------------------|--------|---------------------------|-------------------------------------------------------------------------------------------------------------------------------------------------------------------------------------------------------------------------------------------------|
| JIP4      | YDR474C             | YDR475 | -                         | Protein of unknown function; previously annotated as two separate ORFs, YDR474C and YDR475C, which were merged as a result of corrections to the systematic reference sequence                                                                  |
| JLP1      |                     | YLL057 | -                         | Fe(II)-dependent sulfonate/alpha-ketoglutarate dioxygenase, involved in sulfonate catabolism for use as a sulfur source, contains sequence that closely resembles a J domain (typified by the E. coli DnaJ protein)                             |
| JNM1      | INS1 PAC3           | YMR294 | -                         | Component of the yeast dynactin complex, consisting of Nip100p, Jnm1p, and Arp1p; required for proper nuclear migration and spindle partitioning during mitotic anaphase B                                                                      |
| KAE1      |                     | YKR038 | +                         | Putative glycoprotease proposed to be in transcription as a component of the EKC protein complex with Bud32p, Cgi121p, Pcc1p, and Gon7p; also identified as a component of the KEOPS protein complex                                            |
| KAP114    |                     | YGL241 | -                         | Karyopherin, responsible for nuclear import of Spt15p, histones H2A and H2B, and Nap1p; amino terminus shows similarity to those of other importins, particularly Cse1p; localization is primarily nuclear                                      |
| KAR5      | FIG3                | YMR065 | -                         | Protein required for nuclear membrane fusion during karyogamy, localizes to the membrane with a soluble portion in the endoplasmic reticulum lumen, may form a complex with Jem1p and Kar2p; expression of the gene is regulated by pheromone   |
| KRE11     | TRS65               | YGR166 | +                         | Protein involved in biosynthesis of cell wall beta-glucans; subunit of the TRAPP (transport protein particle) complex, which is involved in the late steps of endoplasmic reticulum to Golgi transport                                          |
| KTI11     | DPH3                | YBL071 | +                         | Zn-ribbon electron carrier protein, required with Dph1p, Dph2p, Jjj3p, and Dph5p for synthesis of diphthamide, a modified histidine residue on Eft1p or Eft2p; required, with Elongator complex, for modification of wobble nucleosides in tRNA |
| KTI12     | TOT4                | YKL110 | +                         | Protein that plays a role, with Elongator complex, in modification of wobble nucleosides in tRNA; involved in sensitivity to G1 arrest induced by zymocin; interacts with chromatin throughout the genome; also interacts with Cdc19p           |
| KTR2      |                     | YKR061 | +                         | Mannosyltransferase involved in N-linked protein glycosylation; member of the KRE2/MNT1 mannosyltransferase family                                                                                                                              |
| LAG2      | ECM36               | YOL025 | -                         | Protein involved in determination of longevity; LAG2 gene is preferentially expressed in young cells; overexpression extends the mean and maximum life span of cells                                                                            |
| LAS1      |                     | YKR063 | +                         | Essential nuclear protein possibly involved in bud formation and morphogenesis; mutants require the SSD1-v allele for viability                                                                                                                 |
| LEE1      |                     | YPL054 | -                         | Zinc-finger protein of unknown function                                                                                                                                                                                                         |
| LEU2      |                     | YCL007 | +                         | Beta-isopropylmalate dehydrogenase (IMDH), catalyzes the third step in the leucine biosynthesis pathway                                                                                                                                         |
| LEU9      |                     | YOR108 | +                         | Alpha-isopropylmalate synthase II (2-isopropylmalate synthase), catalyzes the first step in the leucine biosynthesis pathway; the minor isozyme, responsible for the residual alpha-IPMS activity detected in a leu4 null mutant                |
| LHS1      | CER1 SSI1           | YKL073 | +                         | Molecular chaperone of the endoplasmic reticulum lumen, involved in polypeptide translocation and folding; member of the Hsp70 family; localizes to the lumen of the ER; regulated by the unfolded protein response pathway                     |

| Gene Name | Alternate Gene Name | ORF    | Up + or Down - regulation | Gene Description                                                                                                                                                                                                                                            |
|-----------|---------------------|--------|---------------------------|-------------------------------------------------------------------------------------------------------------------------------------------------------------------------------------------------------------------------------------------------------------|
| LIA1      | MMD1                | YJR070 | -                         | Deoxyhypusine hydroxylase, a HEAT-repeat containing metalloenzyme that catalyses hypusine formation; binds to and is required for the modification of Hyp2p (eIF5A); complements <i>S. pombe</i> <i>mmd1</i> mutants defective in mitochondrial positioning |
| LOT5      |                     | YKL183 | +                         | Protein of unknown function; gene expression increases in cultures shifted to a lower temperature                                                                                                                                                           |
| LPE10     |                     | YPL060 | -                         | Mitochondrial inner membrane magnesium transporter, involved in maintenance of magnesium concentrations inside mitochondria; indirectly affects splicing of group II introns; functionally and structurally related to <i>Mrs2p</i>                         |
| LRC3      |                     | YKL207 | +                         | Putative protein of unknown function; non-essential gene; null mutant displays decreased frequency of mitochondrial genome loss (petite formation) and severe growth defect in minimal glycerol media                                                       |
| LRC5      | FMP38               | YOR205 | -                         | Protein of unknown function; non-tagged protein is detected in purified mitochondria in high-throughput studies; null mutant displays decreased frequency of mitochondrial genome loss and severe growth defect in minimal glycerol media                   |
| LRS4      |                     | YDR439 | -                         | Protein involved in rDNA silencing; positively charged coiled-coil protein with limited similarity to myosin                                                                                                                                                |
| LSC1      |                     | YOR142 | -                         | Alpha subunit of succinyl-CoA ligase, which is a mitochondrial enzyme of the TCA cycle that catalyzes the nucleotide-dependent conversion of succinyl-CoA to succinate; phosphorylated                                                                      |
| LST4      |                     | YKL176 | +                         | Protein possibly involved in a post-Golgi secretory pathway; required for the transport of nitrogen-regulated amino acid permease <i>Gap1p</i> from the Golgi to the cell surface                                                                           |
| LUG1      |                     | YCR087 | +                         | Putative protein of unknown function; green fluorescent protein (GFP)-fusion protein localizes to the nucleolus; YCR087C-A is not an essential gene                                                                                                         |
| LYS1      |                     | YIR034 | +                         | Saccharopine dehydrogenase (NAD <sup>+</sup> , L-lysine-forming), catalyzes the conversion of saccharopine to L-lysine, which is the final step in the lysine biosynthesis pathway                                                                          |
| LYS14     |                     | YDR034 | -                         | Transcriptional activator involved in regulation of genes of the lysine biosynthesis pathway; requires 2-amino adipate semialdehyde as co-inducer                                                                                                           |
| MAG1      | MMS5                | YER142 | -                         | 3-methyl-adenine DNA glycosylase involved in protecting DNA against alkylating agents; initiates base excision repair by removing damaged bases to create abasic sites that are subsequently repaired                                                       |
| MAK11     |                     | YKL021 | +                         | Protein involved in an early, nucleolar step of 60S ribosomal subunit biogenesis; essential for cell growth and replication of killer M1 dsRNA virus; contains four beta-transducin repeats                                                                 |
| MAL12     | MALS                | YGR292 | -                         | Maltase (alpha-D-glucosidase), inducible protein involved in maltose catabolism; encoded in the MAL1 complex locus                                                                                                                                          |
| MAL32     | MAL3S MALS          | YBR299 | -                         | Maltase (alpha-D-glucosidase), inducible protein involved in maltose catabolism; encoded in the MAL3 complex locus; functional in genomic reference strain S288C                                                                                            |
| MCH5      |                     | YOR306 | +                         | Plasma membrane riboflavin transporter; facilitates the uptake of vitamin B2; required for FAD-dependent processes; sequence similarity to mammalian monocarboxylate permeases, however mutants are not deficient in monocarboxylate transport              |
| MCM2      |                     | YBL023 | -                         | Protein involved in DNA replication; component of the Mcm2-7 hexameric complex that binds chromatin as a part of the pre-replicative complex                                                                                                                |

| Gene Name | Alternate Gene Name   | ORF    | Up + or Down - regulation | Gene Description                                                                                                                                                                                                                                 |
|-----------|-----------------------|--------|---------------------------|--------------------------------------------------------------------------------------------------------------------------------------------------------------------------------------------------------------------------------------------------|
| MDH1      |                       | YKL085 | +                         | Mitochondrial malate dehydrogenase, catalyzes interconversion of malate and oxaloacetate; involved in the tricarboxylic acid (TCA) cycle; phosphorylated                                                                                         |
| MDJ2      |                       | YNL328 | -                         | Constituent of the mitochondrial import motor associated with the presequence translocase; function overlaps with that of Pam18p; stimulates the ATPase activity of Ssc1p to drive mitochondrial import; contains a J domain                     |
| MDM35     |                       | YKL053 | +                         | Mitochondrial intermembrane space cysteine motif protein; mutation affects mitochondrial distribution and morphology                                                                                                                             |
| MEC1      | ESR1 SAD <sub>3</sub> | YBR113 | +                         | Genome integrity checkpoint protein and PI kinase superfamily member; signal transducer required for cell cycle arrest and transcriptional responses prompted by damaged or unreplicated DNA; monitors and participates in meiotic recombination |
| MEF2      |                       | YJL102 | +                         | Mitochondrial elongation factor involved in translational elongation                                                                                                                                                                             |
| MEI5      | LPH6                  | YPL121 | +                         | Meiosis specific protein involved in DMC1-dependent meiotic recombination, forms heterodimer with Sae3p; proposed to be an assembly factor for Dmc1p                                                                                             |
| MET12     |                       | YPL023 | +                         | Isozyme of methylenetetrahydrofolate reductase, catalyzes the reduction of 5,10-methylenetetrahydrofolate to 5-methyltetrahydrofolate in the methionine biosynthesis pathway                                                                     |
| MET17     | MET15 MET25           | YLR303 | -                         | Methionine and cysteine synthase (O-acetyl homoserine-O-acetyl serine sulfhydrylase), required for sulfur amino acid synthesis                                                                                                                   |
| MET22     | HAL2                  | YOL064 | -                         | Bisphosphate-3'-nucleotidase, involved in salt tolerance and methionine biogenesis; dephosphorylates 3'-phosphoadenosine-5'-phosphate and 3'-phosphoadenosine-5'-phosphosulfate, intermediates of the sulfate assimilation pathway               |
| MET6      |                       | YER091 | -                         | Cobalamin-independent methionine synthase, involved in amino acid biosynthesis; requires a minimum of two glutamates on the methyltetrahydrofolate substrate, similar to bacterial metE homologs                                                 |
| MGM101    | MGM9                  | YJR144 | +                         | Protein involved in mitochondrial genome maintenance; component of the mitochondrial nucleoid, required for the repair of oxidative mtDNA damage                                                                                                 |
| MHT1      |                       | YLL062 | -                         | S-methylmethionine-homocysteine methyltransferase, functions along with Sam4p in the conversion of S-adenosylmethionine (AdoMet) to methionine to control the methionine/AdoMet ratio                                                            |
| MIC14     |                       | YDR031 | -                         | Mitochondrial intermembrane space cysteine motif protein of 14 kDa                                                                                                                                                                               |
| MIF2      |                       | YKL089 | +                         | Kinetochore protein with homology to human CENP-C, required for structural integrity of the spindle during anaphase spindle elongation, interacts with histones H2A, H2B, and H4, phosphorylated by Ipl1p                                        |
| MIM1      | TOM13                 | YOL026 | +                         | Mitochondrial outer membrane protein, required for assembly of the translocase of the outer membrane (TOM) complex and thereby for mitochondrial protein import; N terminus is exposed to the cytosol: transmembrane segment is highly conserved |
| MIP6      |                       | YHR015 | -                         | Putative RNA-binding protein, interacts with Mex67p, which is a component of the nuclear pore involved in nuclear mRNA export                                                                                                                    |
| MLH2      |                       | YLR035 | -                         | Protein involved in the mismatch repair of certain frameshift intermediates and involved in meiotic recombination; forms a complex with Mlh1p                                                                                                    |
| MMP1      |                       | YLL061 | -                         | High-affinity S-methylmethionine permease, required for utilization of S-methylmethionine as a sulfur source; has similarity to S-adenosylmethionine permease Sam3p                                                                              |



| Gene Name | Alternate Gene Name | ORF    | Up + or Down - regulation | Gene Description                                                                                                                                                                                                                                |
|-----------|---------------------|--------|---------------------------|-------------------------------------------------------------------------------------------------------------------------------------------------------------------------------------------------------------------------------------------------|
| MMS22     | SLM2                | YLR320 | +                         | Protein involved in resistance to ionizing radiation; acts with Mms1p in a repair pathway that may be involved in resolving replication intermediates or preventing the damage caused by blocked replication forks                              |
| MNR2      |                     | YKL064 | +                         | Putative magnesium transporter; has similarity to Alr1p and Alr2p, which mediate influx of Mg <sup>2+</sup> and other divalent cations                                                                                                          |
| MNT3      |                     | YIL014 | -                         | Alpha-1,3-mannosyltransferase, adds the fourth and fifth alpha-1,3-linked mannose residues to O-linked glycans during protein O-glycosylation                                                                                                   |
| MOB1      |                     | YIL106 | -                         | Component of the mitotic exit network; associates with and is required for the activation and Cdc15p-dependent phosphorylation of the Dbf2p kinase; required for cytokinesis and cell separation; component of the CCR4 transcriptional complex |
| MPC54     |                     | YOR177 | -                         | Component of the meiotic outer plaque, a membrane-organizing center which is assembled on the cytoplasmic face of the spindle pole body during meiosis II and triggers the formation of the prospore membrane; potential Cdc28p substrate       |
| MRE11     | NGS1 RAD58 XRS4     | YMR224 | -                         | Subunit of a complex with Rad50p and Xrs2p (RMX complex) that functions in repair of DNA double-strand breaks and in telomere stability, exhibits nuclease activity that appears to be required for RMX function; widely conserved              |
| MRH1      |                     | YDR033 | -                         | Protein that localizes primarily to the plasma membrane, also found at the nuclear envelope; the authentic, non-tagged protein is detected in mitochondria in a phosphorylated state; has similarity to Hsp30p and Yro2p                        |
| MRN1      |                     | YPL184 | +                         | Putative RNA binding protein                                                                                                                                                                                                                    |
| MRPL10    | MRPL18              | YNL284 | -                         | Mitochondrial ribosomal protein of the large subunit; appears as two protein spots (YmL10 and YmL18) on two-dimensional SDS gels                                                                                                                |
| MRPL44    | YMR44               | YMR225 | +                         | Mitochondrial ribosomal protein of the large subunit                                                                                                                                                                                            |
| MSH3      |                     | YCR092 | +                         | Mismatch repair protein, forms dimers with Msh2p that mediate repair of insertion or deletion mutations and removal of nonhomologous DNA ends, contains a PCNA (Pol30p) binding motif required for genome stability                             |
| MSH4      |                     | YFL003 | -                         | Protein involved in meiotic recombination, required for normal levels of crossing over, colocalizes with Zip2p to discrete foci on meiotic chromosomes, has homology to bacterial MutS protein                                                  |
| MSP1      | YTA4                | YGR028 | -                         | Mitochondrial protein involved in sorting of proteins in the mitochondria; putative membrane-spanning ATPase                                                                                                                                    |
| MSS1      | PET53               | YMR023 | -                         | Mitochondrial protein, forms a heterodimer complex with Mto1p that performs the 5-carboxymethylaminomethyl modification of the wobble uridine base in mitochondrial tRNAs; similar to human GTPBP3                                              |
| MST1      |                     | YKL194 | +                         | Mitochondrial threonyl-tRNA synthetase                                                                                                                                                                                                          |
| MST28     |                     | YAR033 | -                         | Putative integral membrane protein, involved in vesicle formation; forms complex with Mst27p; member of DUP240 gene family; binds COPI and COPII vesicles                                                                                       |

| Gene Name | Alternate Gene Name | ORF    | Up + or Down - regulation | Gene Description                                                                                                                                                                                                                              |
|-----------|---------------------|--------|---------------------------|-----------------------------------------------------------------------------------------------------------------------------------------------------------------------------------------------------------------------------------------------|
| MTD1      |                     | YKR080 | +                         | NAD-dependent 5,10-methylenetetrahydrofolate dehydrogenase, plays a catalytic role in oxidation of cytoplasmic one-carbon units; expression is regulated by Bas1p and Bas2p, repressed by adenine, and may be induced by inositol and choline |
| MTF1      |                     | YMR228 | -                         | Mitochondrial RNA polymerase specificity factor with structural similarity to S-adenosylmethionine-dependent methyltransferases and functional similarity to bacterial sigma-factors, interacts with mitochondrial core polymerase Rpo41p     |
| MUC1      | FLO11 STA4          | YIR019 | +                         | GPI-anchored cell surface glycoprotein (flocculin) required for pseudohyphal formation, invasive growth, flocculation, and biofilms; transcriptionally regulated by the MAPK pathway (via Ste12p and Tec1p) and the cAMP pathway (via Flo8p)  |
| NDE2      | NDH2                | YDL085 | -                         | Mitochondrial external NADH dehydrogenase, catalyzes the oxidation of cytosolic NADH; Nde1p and Nde2p are involved in providing the cytosolic NADH to the mitochondrial respiratory chain                                                     |
| NDJ1      | TAM1                | YOL104 | -                         | Meiosis-specific telomere protein, required for bouquet formation, effective homolog pairing, ordered cross-over distribution (interference), sister chromatid cohesion at meiotic telomeres, and segregation of small chromosomes            |
| NFT1      |                     | YKR103 | +                         | Putative transporter of the multidrug resistance-associated protein (MRP) subfamily; adjacent ORFs YKR103W and YKR104W are merged in different strain backgrounds.                                                                            |
| NFU1      | NUB1                | YKL040 | +                         | Protein involved in iron metabolism in mitochondria; similar to NifU, which is a protein required for the maturation of the Fe/S clusters of nitrogenase in nitrogen-fixing bacteria                                                          |
| NGL3      |                     | YML118 | -                         | Putative endonuclease, has a domain similar to a magnesium-dependent endonuclease motif in mRNA deadenylase Ccr4p; similar to Ngl1p and Ngl2p                                                                                                 |
| NKP1      |                     | YDR383 | -                         | Non-essential kinetochore protein, subunit of the Ctf19 central kinetochore complex (Ctf19p-Mcm21p-Okp1p-Mcm22p-Mcm16p-Ctf3p-Chl4p-Mcm19p-Nkp1p-Nkp2p-Ame1p-Mtw1p)                                                                            |
| NOP4      | NOP77               | YPL043 | -                         | Nucleolar protein, essential for processing and maturation of 27S pre-rRNA and large ribosomal subunit biogenesis; constituent of 66S pre-ribosomal particles; contains four RNA recognition motifs (RRMs)                                    |
| NQM1      |                     | YGR043 | -                         | Protein of unknown function; transcription is repressed by Mot1p and induced by alpha-factor and during diauxic shift; null mutant non-quiescent cells exhibit reduced reproductive capacity                                                  |
| NRD1      |                     | YNL251 | +                         | RNA-binding protein that interacts with the C-terminal domain of the RNA polymerase II large subunit (Rpo21p), required for transcription termination and 3' end maturation of nonpolyadenylated RNAs                                         |
| NSA1      |                     | YGL111 | -                         | Constituent of 66S pre-ribosomal particles, involved in 60S ribosomal subunit biogenesis                                                                                                                                                      |
| NSE3      |                     | YDR285 | -                         | Essential subunit of the Mms21-Smc5-Smc6 complex; protein of unknown function; required for DNA repair and growth                                                                                                                             |
| NSL1      |                     | YPL233 | -                         | Essential component of the MIND kinetochore complex (Mtw1p Including Nnf1p-Nsl1p-Dsn1p) which joins kinetochore subunits contacting DNA to those contacting microtubules; required for accurate chromosome segregation                        |
| NTE1      |                     | YML059 | -                         | Serine esterase that deacylates exogenous lysophospholipids, homolog of human neuropathy target esterase (NTE); mammalian NTE1 deacylates phosphatidylcholine to glycerophosphocholine                                                        |
| NTH1      |                     | YDR001 | -                         | Neutral trehalase, degrades trehalose; required for thermotolerance and may mediate resistance to other cellular stresses; may be phosphorylated by Cdc28p                                                                                    |

| Gene Name | Alternate Gene Name | ORF    | Up + or Down - regulation | Gene Description                                                                                                                                                                                                                               |
|-----------|---------------------|--------|---------------------------|------------------------------------------------------------------------------------------------------------------------------------------------------------------------------------------------------------------------------------------------|
| NTR2      |                     | YKR022 | +                         | Essential protein that forms a dimer with Ntr1p; also forms a trimer, with Ntr2p and the DExD/H-box RNA helicase Prp43p, that is involved in spliceosome disassembly                                                                           |
| NUG1      |                     | YER006 | -                         | GTPase that associates with nuclear 60S pre-ribosomes, required for export of 60S ribosomal subunits from the nucleus                                                                                                                          |
| NUP133    | RAT3                | YKR082 | -                         | Subunit of the Nup84p subcomplex of the nuclear pore complex (NPC), localizes to both sides of the NPC, required to establish a normal nucleocytoplasmic concentration gradient of the GTPase Gsp1p                                            |
| NUP188    |                     | YML103 | +                         | Subunit of the nuclear pore complex (NPC), involved in the structural organization of the complex and of the nuclear envelope, also involved in nuclear envelope permeability, interacts with Pom152p and Nic96p                               |
| OAF3      |                     | YKR064 | +                         | Zinc cluster protein of unknown function; the authentic, non-tagged protein is detected in highly purified mitochondria in high-throughput studies                                                                                             |
| OM45      |                     | YIL136 | -                         | Protein of unknown function, major constituent of the mitochondrial outer membrane; located on the outer (cytosolic) face of the outer membrane                                                                                                |
| OMA1      |                     | YKR087 | +                         | Metalloendopeptidase of the mitochondrial inner membrane, involved in turnover of membrane-embedded proteins; member of a family of predicted membrane-bound metallopeptidases in prokaryotes and higher eukaryotes                            |
| OMS1      |                     | YDR316 | -                         | Protein integral to the mitochondrial membrane; has a conserved methyltransferase motif; multicopy suppressor of respiratory defects caused by OXA1 mutations                                                                                  |
| OMS1      |                     | YDR316 | -                         | Protein integral to the mitochondrial membrane; has a conserved methyltransferase motif; multicopy suppressor of respiratory defects caused by OXA1 mutations                                                                                  |
| ORM1      |                     | YGR038 | -                         | Evolutionarily conserved protein with similarity to Orm2p, required for resistance to agents that induce the unfolded protein response; human ortholog is located in the endoplasmic reticulum                                                 |
| OST5      |                     | YGL226 | +                         | Zeta subunit of the oligosaccharyltransferase complex of the ER lumen, which catalyzes asparagine-linked glycosylation of newly synthesized proteins                                                                                           |
| OSW2      |                     | YLR054 | -                         | Protein of unknown function proposed to be involved in the assembly of the spore wall                                                                                                                                                          |
| OYE3      | ZRG6                | YPL171 | +                         | Widely conserved NADPH oxidoreductase containing flavin mononucleotide (FMN), homologous to Oye2p with slight differences in ligand binding and catalytic properties; may be involved in sterol metabolism                                     |
| PAM1      |                     | YDR251 | -                         | Essential protein of unknown function; exhibits variable expression during colony morphogenesis; overexpression permits survival without protein phosphatase 2A, inhibits growth, and induces a filamentous phenotype                          |
| PAM17     | FMP18               | YKR065 | +                         | Presequence translocase-associated motor subunit, required for stable complex formation between cochaperones Pam16p and Pam18p, promotes association of Pam16p-Pam18p with the presequence translocase                                         |
| PAN1      | DIM2 MDP3 MIP3      | YIR006 | -                         | Part of actin cytoskeleton-regulatory complex Pan1p-Sla1p-End3p, associates with actin patches on the cell cortex; promotes protein-protein interactions essential for endocytosis; previously thought to be a subunit of poly(A) ribonuclease |
| PAN3      | ECM35               | YKL025 | +                         | Essential subunit of the Pan2p-Pan3p poly(A)-ribonuclease complex, which acts to control poly(A) tail length and regulate the stoichiometry and activity of postreplication repair complexes                                                   |

| Gene Name | Alternate Gene Name | ORF    | Up + or Down - regulation | Gene Description                                                                                                                                                                                                                        |
|-----------|---------------------|--------|---------------------------|-----------------------------------------------------------------------------------------------------------------------------------------------------------------------------------------------------------------------------------------|
| PAU1      |                     | YJL223 | -                         | Part of 23-member seripauperin multigene family encoded mainly in subtelomeric regions, active during alcoholic fermentation, regulated by anaerobiosis, negatively regulated by oxygen, repressed by heme                              |
| PAU10     |                     | YDR542 | -                         | Hypothetical protein                                                                                                                                                                                                                    |
| PAU11     |                     | YGL261 | -                         | Putative protein of unknown function; mRNA expression appears to be regulated by SUT1 and UPC2                                                                                                                                          |
| PAU12     |                     | YGR294 | -                         | Hypothetical protein                                                                                                                                                                                                                    |
| PAU13     |                     | YHL046 | -                         | Putative protein of unknown function; not an essential gene                                                                                                                                                                             |
| PAU14     |                     | YIL176 | -                         | Hypothetical protein                                                                                                                                                                                                                    |
| PAU16     |                     | YKL224 | -                         | Putative protein of unknown function                                                                                                                                                                                                    |
| PAU18     |                     | YLL064 | -                         | Hypothetical protein                                                                                                                                                                                                                    |
| PAU19     |                     | YMR325 | -                         | Hypothetical protein                                                                                                                                                                                                                    |
| PAU20     |                     | YOL161 | -                         | Hypothetical protein                                                                                                                                                                                                                    |
| PAU21     |                     | YOR394 | -                         | Hypothetical protein                                                                                                                                                                                                                    |
| PAU22     |                     | YPL282 | -                         | Hypothetical protein                                                                                                                                                                                                                    |
| PAU3      |                     | YCR104 | -                         | Part of 23-member seripauperin multigene family encoded mainly in subtelomeric regions, active during alcoholic fermentation, regulated by anaerobiosis, negatively regulated by oxygen, repressed by heme                              |
| PAU4      |                     | YLR461 | -                         | Part of 23-member seripauperin multigene family encoded mainly in subtelomeric regions, active during alcoholic fermentation, regulated by anaerobiosis, negatively regulated by oxygen, repressed by heme                              |
| PAU6      |                     | YNR076 | -                         | Part of 23-member seripauperin multigene family encoded mainly in subtelomeric regions, active during alcoholic fermentation, regulated by anaerobiosis, negatively regulated by oxygen, repressed by heme                              |
| PAU8      |                     | YAL068 | -                         | Hypothetical protein                                                                                                                                                                                                                    |
| PBS2      | HOG4 SFS4 SSK4      | YJL128 | -                         | MAP kinase kinase that plays a pivotal role in the osmosensing signal-transduction pathway, activated under severe osmotic stress                                                                                                       |
| PDE1      |                     | YGL248 | -                         | Low-affinity cyclic AMP phosphodiesterase, controls glucose and intracellular acidification-induced cAMP signaling, target of the cAMP-protein kinase A (PKA) pathway; glucose induces transcription and inhibits translation           |
| PDH1      |                     | YPR002 | -                         | Mitochondrial protein that participates in respiration, induced by diauxic shift; homologous to E. coli PrpD, may take part in the conversion of 2-methylcitrate to 2-methylisocitrate                                                  |
| PDH1      |                     | YPR002 | -                         | Mitochondrial protein that participates in respiration, induced by diauxic shift; homologous to E. coli PrpD, may take part in the conversion of 2-methylcitrate to 2-methylisocitrate                                                  |
| PDR15     |                     | YDR406 | -                         | Plasma membrane ATP binding cassette (ABC) transporter, multidrug transporter and general stress response factor implicated in cellular detoxification; regulated by Pdr1p, Pdr3p and Pdr8p; promoter contains a PDR responsive element |
| PDR3      | AMY2 TPE2           | YBL005 | -                         | Transcriptional activator of the pleiotropic drug resistance network, regulates expression of ATP-binding cassette (ABC) transporters through binding to cis-acting sites known as PDREs (PDR responsive elements)                      |
| PDR5      | LEM1 STS1 YDR1      | YOR153 | -                         | Plasma membrane ATP-binding cassette (ABC) transporter, short-lived multidrug transporter actively regulated by Pdr1p; also involved in steroid transport, cation resistance, and cellular detoxification during exponential growth     |

| Gene Name | Alternate Gene Name         | ORF    | Up + or Down - regulation | Gene Description                                                                                                                                                                                                                             |
|-----------|-----------------------------|--------|---------------------------|----------------------------------------------------------------------------------------------------------------------------------------------------------------------------------------------------------------------------------------------|
| PEP5      | END1 VAM1 VPL9 VP S11 VPT11 | YMR231 | +                         | Component of CORVET tethering complex; peripheral vacuolar membrane protein required for protein trafficking and vacuole biogenesis; interacts with Pep7p                                                                                    |
| PET10     |                             | YKR046 | +                         | Protein of unknown function that co-purifies with lipid particles; expression pattern suggests a role in respiratory growth; computational analysis of large-scale protein-protein interaction data suggests a role in ATP/ADP exchange      |
| PFK1      |                             | YGR240 | -                         | Alpha subunit of heterooctameric phosphofructokinase involved in glycolysis, indispensable for anaerobic growth, activated by fructose-2,6-bisphosphate and AMP, mutation inhibits glucose induction of cell cycle-related genes             |
| PGA2      |                             | YNL149 | +                         | Essential protein required for maturation of Gas1p and Pho8p; involved in protein trafficking; GFP-fusion protein localizes to the ER and YFP-fusion protein to the nuclear envelope-ER network; null mutants have a cell separation defect  |
| PHO11     |                             | YAR071 | -                         | One of three repressible acid phosphatases, a glycoprotein that is transported to the cell surface by the secretory pathway; induced by phosphate starvation and coordinately regulated by PHO4 and PHO2                                     |
| PHO12     | PHO10                       | YHR215 | -                         | Glycerol proton symporter of the plasma membrane, subject to glucose-induced inactivation, strongly but transiently induced when cells are subjected to osmotic shock                                                                        |
| PHO84     |                             | YML123 | -                         | High-affinity inorganic phosphate (Pi) transporter and low-affinity manganese transporter; regulated by Pho4p and Spt7p; mutation confers resistance to arsenate; exit from the ER during maturation requires Pho86p                         |
| PHO89     | ITN1                        | YBR296 | -                         | Na <sup>+</sup> /Pi cotransporter, active in early growth phase; similar to phosphate transporters of <i>Neurospora crassa</i> ; transcription regulated by inorganic phosphate concentrations and Pho4p                                     |
| PIR1      | CCW6                        | YKL164 | +                         | O-glycosylated protein required for cell wall stability; attached to the cell wall via beta-1,3-glucan; mediates mitochondrial translocation of Apn1p; expression regulated by the cell integrity pathway and by Swi5p during the cell cycle |
| PIR3      | CCW8                        | YKL163 | +                         | O-glycosylated covalently-bound cell wall protein required for cell wall stability; expression is cell cycle regulated, peaking in M/G1 and also subject to regulation by the cell integrity pathway                                         |
| POB3      |                             | YML069 | +                         | Subunit of the heterodimeric FACT complex (Spt16p-Pob3p), which facilitates RNA Pol II transcription elongation through nucleosomes by destabilizing and then reassembling nucleosome structure; interacts with DNA polymerase alpha (Pol1p) |
| POC4      |                             | YPL144 | +                         | Chaperone component involved in 20S proteasome assembly; forms a heterodimer with Irc25p; green fluorescent protein (GFP)-fusion protein localizes to the cytoplasm; null mutant is viable, exhibits shortened telomeres                     |
| POX1      | FOX1                        | YGL205 | -                         | Fatty-acyl coenzyme A oxidase, involved in the fatty acid beta-oxidation pathway; localized to the peroxisomal matrix                                                                                                                        |
| PPR1      |                             | YLR014 | +                         | Zinc finger transcription factor containing a Zn(2)-Cys(6) binuclear cluster domain, positively regulates transcription of genes involved in uracil biosynthesis; activity may be modulated by interaction with Tup1p                        |

| Gene Name | Alternate Gene Name | ORF    | Up + or Down - regulation | Gene Description                                                                                                                                                                                                                           |
|-----------|---------------------|--------|---------------------------|--------------------------------------------------------------------------------------------------------------------------------------------------------------------------------------------------------------------------------------------|
| PRM2      |                     | YIL037 | -                         | Pheromone-regulated protein, predicted to have 4 transmembrane segments and a coiled coil domain; regulated by Ste12p                                                                                                                      |
| PRM6      |                     | YML047 | -                         | Pheromone-regulated protein, predicted to have 2 transmembrane segments; regulated by Ste12p during mating                                                                                                                                 |
| PRM9      |                     | YAR031 | -                         | Pheromone-regulated protein with 3 predicted transmembrane segments and an FF sequence, a motif involved in COPII binding; member of DUP240 gene family                                                                                    |
| PRP16     |                     | YKR086 | +                         | RNA helicase in the DEAH-box family involved in the second catalytic step of splicing, exhibits ATP-dependent RNA unwinding activity                                                                                                       |
| PRP2      | RNA2                | YNR011 | +                         | RNA-dependent ATPase in the DEAH-box family, required for activation of the spliceosome before the first transesterification step in RNA splicing                                                                                          |
| PRP9      |                     | YDL030 | +                         | Subunit of the SF3a splicing factor complex, required for spliceosome assembly; acts after the formation of the U1 snRNP-pre-mRNA complex                                                                                                  |
| PRR1      |                     | YKL115 | +                         | Serine/threonine protein kinase that inhibits pheromone induced signalling downstream of MAPK, possibly at the level of the Ste12p transcription factor                                                                                    |
| PRS1      | PRP1                | YKL181 | +                         | 5-phospho-ribosyl-1(alpha)-pyrophosphate synthetase, involved in nucleotide, histidine, and tryptophan biosynthesis; one of five related enzymes, which are active as heteromultimeric complexes                                           |
| PRY2      | YFW12               | YKR013 | +                         | Protein of unknown function, has similarity to Pry1p and Pry3p and to the plant PR-1 class of pathogen related proteins                                                                                                                    |
| PSA1      | MPG1 SRB1 VIG9      | YDL055 | -                         | GDP-mannose pyrophosphorylase (mannose-1-phosphate guanyltransferase), synthesizes GDP-mannose from GTP and mannose-1-phosphate in cell wall biosynthesis; required for normal cell wall structure                                         |
| PTA1      | FUN39               | YAL043 | +                         | Subunit of holo-CPF, a multiprotein complex and functional homolog of mammalian CPSF, required for the cleavage and polyadenylation of mRNA and snoRNA 3' ends; involved in pre-tRNA processing; binds to the phosphorylated CTD of RNAPII |
| PTM1      |                     | YKL039 | +                         | Protein of unknown function, copurifies with late Golgi vesicles containing the v-SNARE Tlg2p                                                                                                                                              |
| PUF3      |                     | YLL013 | -                         | Protein of the mitochondrial outer surface, links the Arp2/3 complex with the mitochore during anterograde mitochondrial movement; also binds to and promotes degradation of mRNAs for select nuclear-encoded mitochondrial proteins       |
| PUG1      |                     | YER185 | -                         | Plasma membrane protein involved in protoporphyrin uptake; similar in sequence to RSB1, which is involved in sphingoid long-chain base release                                                                                             |
| PUT3      |                     | YKL015 | +                         | Transcriptional activator of proline utilization genes, constitutively binds PUT1 and PUT2 promoter sequences and undergoes a conformational change to form the active state; has a Zn(2)-Cys(6) binuclear cluster domain                  |
| PYC1      |                     | YGL062 | -                         | Pyruvate carboxylase isoform, cytoplasmic enzyme that converts pyruvate to oxaloacetate; highly similar to isoform Pyc2p but differentially regulated; mutations in the human homolog are associated with lactic acidosis                  |
| PYK2      |                     | YOR347 | -                         | Pyruvate kinase that appears to be modulated by phosphorylation; PYK2 transcription is repressed by glucose, and Pyk2p may be active under low glycolytic flux                                                                             |

| Gene Name | Alternate Gene Name | ORF    | Up + or Down - regulation | Gene Description                                                                                                                                                                                                                  |
|-----------|---------------------|--------|---------------------------|-----------------------------------------------------------------------------------------------------------------------------------------------------------------------------------------------------------------------------------|
| QDR1      |                     | YIL120 | -                         | Multidrug transporter of the major facilitator superfamily, required for resistance to quinidine, ketoconazole, fluconazole, and barban                                                                                           |
| RAD59     |                     | YDL059 | -                         | Protein involved in the repair of double-strand breaks in DNA during vegetative growth via recombination and single-strand annealing; anneals complementary single-stranded DNA; homologous to Rad52p                             |
| RDS1      |                     | YCR106 | -                         | Zinc cluster transcription factor involved in conferring resistance to cycloheximide                                                                                                                                              |
| REC104    |                     | YHR157 | +                         | Protein involved in early stages of meiotic recombination; required for meiotic crossing over; forms a complex with Rec102p and Spo11p necessary during the initiation of recombination                                           |
| RED1      |                     | YLR263 | +                         | Protein component of the axial elements of the synaptonemal complex, involved in chromosome segregation during the first meiotic division; interacts with Hop1p; required for wild-type levels of Mek1p kinase activity           |
| REG2      |                     | YBR050 | -                         | Regulatory subunit of the Glc7p type-1 protein phosphatase; involved with Reg1p, Glc7p, and Snf1p in regulation of glucose-repressible genes, also involved in glucose-induced proteolysis of maltose permease                    |
| RER1      |                     | YCL001 | -                         | Protein involved in retention of membrane proteins, including Sec12p, in the ER; localized to Golgi; functions as a retrieval receptor in returning membrane proteins to the ER                                                   |
| REV3      | PSO1                | YPL167 | +                         | Catalytic subunit of DNA polymerase zeta, which is involved in DNA repair and translesion synthesis; required for mutagenesis induced by DNA damage                                                                               |
| RGA1      | DBM1 THE1           | YOR127 | -                         | GTPase-activating protein for the polarity-establishment protein Cdc42p; implicated in control of septin organization, pheromone response, and haploid invasive growth                                                            |
| RGT1      |                     | YKL038 | +                         | Glucose-responsive transcription factor that regulates expression of several glucose transporter (HXT) genes in response to glucose; binds to promoters and acts both as a transcriptional activator and repressor                |
| RHR2      | GPP1                | YIL053 | -                         | Constitutively expressed isoform of DL-glycerol-3-phosphatase; involved in glycerol biosynthesis, induced in response to both anaerobic and, along with the Hor2p/Gpp2p isoform, osmotic stress                                   |
| RIB2      | PUS8                | YOL066 | -                         | DRAP deaminase, catalyzes the third step of the riboflavin biosynthesis pathway; cytoplasmic tRNA pseudouridine synthase involved in pseudouridylation of cytoplasmic tRNAs at position 32                                        |
| RIB4      |                     | YOL143 | +                         | Lumazine synthase (6,7-dimethyl-8-ribityllumazine synthase, also known as DMRL synthase); catalyzes synthesis of immediate precursor to riboflavin                                                                                |
| RIT1      |                     | YMR283 | -                         | 2'-O-ribosyl phosphate transferase, modifies the initiator methionine tRNA at position 64 to distinguish it from elongator methionine tRNA                                                                                        |
| RNA14     |                     | YMR061 | -                         | Cleavage and polyadenylation factor I (CF I) component involved in cleavage and polyadenylation of mRNA 3' ends; bridges interaction between Rna15p and Hrp1p in the CF I complex                                                 |
| ROD1      |                     | YOR018 | +                         | Membrane protein; overexpression confers resistance to the GST substrate o-dinitrobenzene as well as to zinc and calcium; contains 2 PY motifs, which are required for Rod1p interaction with Rsp5p, a hect-type ubiquitin ligase |
| RPB11     |                     | YOL005 | +                         | RNA polymerase II subunit B12.5; part of central core; similar to Rpc19p and bacterial alpha subunit                                                                                                                              |
| RPB3      |                     | YIL021 | -                         | RNA polymerase II third largest subunit B44, part of central core; similar to prokaryotic alpha subunit                                                                                                                           |
| RPC37     |                     | YKR025 | +                         | RNA polymerase III subunit C37                                                                                                                                                                                                    |

| Gene Name | Alternate Gene Name     | ORF    | Up + or Down - regulation | Gene Description                                                                                                                                                                                                                            |
|-----------|-------------------------|--------|---------------------------|---------------------------------------------------------------------------------------------------------------------------------------------------------------------------------------------------------------------------------------------|
| RPE1      | EPI1 POS18              | YJL121 | -                         | D-ribulose-5-phosphate 3-epimerase, catalyzes a reaction in the non-oxidative part of the pentose-phosphate pathway; mutants are sensitive to oxidative stress                                                                              |
| RPL14B    |                         | YHL001 | +                         | Protein component of the large (60S) ribosomal subunit, nearly identical to Rpl14Ap and has similarity to rat L14 ribosomal protein                                                                                                         |
| RPL17A    | RPL17                   | YKL180 | +                         | Protein component of the large (60S) ribosomal subunit, nearly identical to Rpl17Bp and has similarity to E. coli L22 and rat L17 ribosomal proteins; copurifies with the Dam1 complex (aka DASH complex)                                   |
| RPL17B    |                         | YJL177 | +                         | Protein component of the large (60S) ribosomal subunit, nearly identical to Rpl17Ap and has similarity to E. coli L22 and rat L17 ribosomal proteins                                                                                        |
| RPL1A     | SSM1                    | YPL220 | +                         | N-terminally acetylated protein component of the large (60S) ribosomal subunit, nearly identical to Rpl1Bp and has similarity to E. coli L1 and rat L10a ribosomal proteins; rpl1a rpl1b double null mutation is lethal                     |
| RPL1B     | SSM2                    | YGL135 | +                         | N-terminally acetylated protein component of the large (60S) ribosomal subunit, nearly identical to Rpl1Ap and has similarity to E. coli L1 and rat L10a ribosomal proteins; rpl1a rpl1b double null mutation is lethal                     |
| RPL37A    |                         | YLR185 | +                         | Protein component of the large (60S) ribosomal subunit, has similarity to Rpl37Bp and to rat L37 ribosomal protein                                                                                                                          |
| RPL37B    |                         | YDR500 | +                         | Protein component of the large (60S) ribosomal subunit, has similarity to Rpl37Ap and to rat L37 ribosomal protein                                                                                                                          |
| RPL39     | PUB2 RPL46 SPB2         | YJL189 | +                         | Protein component of the large (60S) ribosomal subunit, has similarity to rat L39 ribosomal protein; required for ribosome biogenesis; exhibits genetic interactions with SIS1 and PAB1                                                     |
| RPL40A    | CEP52A UB11 UBI1        | YIL148 | +                         | Fusion protein, identical to Rpl40Bp, that is cleaved to yield ubiquitin and a ribosomal protein of the large (60S) ribosomal subunit with similarity to rat L40; ubiquitin may facilitate assembly of the ribosomal protein into ribosomes |
| RPO21     | RPB1 RPB220 SUA8        | YDL140 | -                         | RNA polymerase II largest subunit B220, part of central core; phosphorylation of C-terminal heptapeptide repeat domain regulates association with transcription and splicing factors; similar to bacterial beta-prime                       |
| RPP1A     | RPLA1                   | YDL081 | +                         | Ribosomal stalk protein P1 alpha, involved in the interaction between translational elongation factors and the ribosome; accumulation of P1 in the cytoplasm is regulated by phosphorylation and interaction with the P2 stalk component    |
| RPS12     |                         | YOR369 | +                         | Protein component of the small (40S) ribosomal subunit; has similarity to rat ribosomal protein S12                                                                                                                                         |
| RPS2      | RPS4 SUP138 SUP38 SUP44 | YGL123 | +                         | Protein component of the small (40S) subunit, essential for control of translational accuracy; has similarity to E. coli S5 and rat S2 ribosomal proteins                                                                                   |
| RPS21A    | RPS25                   | YKR057 | +                         | Protein component of the small (40S) ribosomal subunit; nearly identical to Rps21Bp and has similarity to rat S21 ribosomal protein                                                                                                         |
| RPS21B    |                         | YJL136 | +                         | Protein component of the small (40S) ribosomal subunit; nearly identical to Rps21Ap and has similarity to rat S21 ribosomal protein                                                                                                         |



| Gene Name | Alternate Gene Name | ORF    | Up + or Down - regulation | Gene Description                                                                                                                                                                                                                                 |
|-----------|---------------------|--------|---------------------------|--------------------------------------------------------------------------------------------------------------------------------------------------------------------------------------------------------------------------------------------------|
| RPS25A    | RPS31A              | YGR027 | -                         | Protein component of the small (40S) ribosomal subunit; nearly identical to Rps25Bp and has similarity to rat S25 ribosomal protein                                                                                                              |
| RPS26A    | RPS26               | YGL189 | +                         | Protein component of the small (40S) ribosomal subunit; nearly identical to Rps26Bp and has similarity to rat S26 ribosomal protein                                                                                                              |
| RPS28A    | RPS33A              | YOR167 | +                         | Protein component of the small (40S) ribosomal subunit; nearly identical to Rps28Bp and has similarity to rat S28 ribosomal protein                                                                                                              |
| RPS28B    | RPS33B              | YLR264 | +                         | Protein component of the small (40S) ribosomal subunit; nearly identical to Rps28Ap and has similarity to rat S28 ribosomal protein                                                                                                              |
| RPS30A    |                     | YLR287 | +                         | Protein component of the small (40S) ribosomal subunit; nearly identical to Rps30Bp and has similarity to rat S30 ribosomal protein                                                                                                              |
| RPS31     | RPS37 UBI3          | YLR167 | +                         | Fusion protein that is cleaved to yield a ribosomal protein of the small (40S) subunit and ubiquitin; ubiquitin may facilitate assembly of the ribosomal protein into ribosomes; interacts genetically with translation factor eIF2B             |
| RRF1      | FIL1 KIM4           | YHR038 | -                         | Mitochondrial ribosome recycling factor, essential for mitochondrial protein synthesis and for the maintenance of the respiratory function of mitochondria                                                                                       |
| RRN3      |                     | YKL125 | +                         | Protein required for transcription of rDNA by RNA polymerase I; transcription factor independent of DNA template; involved in recruitment of RNA polymerase I to rDNA                                                                            |
| RRP6      |                     | YOR001 | -                         | Exonuclease component of the nuclear exosome; contributes to the quality-control system that retains and degrades aberrant mRNAs in the nucleus                                                                                                  |
| RRP9      |                     | YPR137 | -                         | Protein involved in pre-rRNA processing, associated with U3 snRNP; component of small ribosomal subunit (SSU) processosome; ortholog of the human U3-55k protein                                                                                 |
| RTA1      |                     | YGR213 | +                         | Protein involved in 7-aminocholesterol resistance; has seven potential membrane-spanning regions                                                                                                                                                 |
| RTS2      | YOR29-28            | YOR077 | -                         | Basic zinc-finger protein, similar to human and mouse Kin17 proteins which are chromatin-associated proteins involved in UV response and DNA replication                                                                                         |
| RTS3      |                     | YGR161 | -                         | Putative component of the protein phosphatase type 2A complex                                                                                                                                                                                    |
| RTS3      |                     | YGR161 | -                         | Putative component of the protein phosphatase type 2A complex                                                                                                                                                                                    |
| SAG1      | AG(ALPHA A)1        | YJR004 | -                         | Alpha-agglutinin of alpha-cells, binds to Aga1p during agglutination, N-terminal half is homologous to the immunoglobulin superfamily and contains binding site for a-agglutinin, C-terminal half is highly glycosylated and contains GPI anchor |
| SAM4      |                     | YPL273 | +                         | S-adenosylmethionine-homocysteine methyltransferase, functions along with Mht1p in the conversion of S-adenosylmethionine (AdoMet) to methionine to control the methionine/AdoMet ratio                                                          |
| SAS4      |                     | YDR181 | +                         | Subunit of the SAS complex (Sas2p, Sas4p, Sas5p), which acetylates free histones and nucleosomes and regulates transcriptional silencing; required for the HAT activity of Sas2p                                                                 |
| SAS5      |                     | YOR213 | -                         | Subunit of the SAS complex (Sas2p, Sas4p, Sas5p), which acetylates free histones and nucleosomes and regulates transcriptional silencing; stimulates Sas2p HAT activity                                                                          |
| SBA1      |                     | YKL116 | +                         | Co-chaperone that binds to and regulates Hsp90 family chaperones; important for pp60v-src activity in yeast; homologous to the mammalian p23 proteins and like p23 can regulate telomerase activity                                              |

| Gene Name | Alternate Gene Name | ORF    | Up + or Down - regulation | Gene Description                                                                                                                                                                                                                               |
|-----------|---------------------|--------|---------------------------|------------------------------------------------------------------------------------------------------------------------------------------------------------------------------------------------------------------------------------------------|
| SBE2      |                     | YDR351 | -                         | Protein involved in the transport of cell wall components from the Golgi to the cell surface; required for bud growth                                                                                                                          |
| SCM3      |                     | YDL139 | -                         | Nonhistone component of centromeric chromatin that binds stoichiometrically to CenH3-H4 histones, required for kinetochore assembly; contains nuclear export signal (NES); required for G2/M progression and localization of Cse4p             |
| SDS22     | EGP1                | YKL193 | +                         | Conserved nuclear regulatory subunit of Glc7p type 1 protein serine-threonine phosphatase (PP1), functions positively with Glc7p to promote dephosphorylation of nuclear substrates required for chromosome transmission during mitosis        |
| SDS3      |                     | YIL084 | -                         | Component of the Rpd3p/Sin3p deacetylase complex required for its structural integrity and catalytic activity, involved in transcriptional silencing and required for sporulation; cells defective in SDS3 display pleiotropic phenotypes      |
| SEC53     | ALG4                | YFL045 | +                         | Phosphomannomutase, involved in synthesis of GDP-mannose and dolichol-phosphate-mannose; required for folding and glycosylation of secretory proteins in the ER lumen                                                                          |
| SED1      |                     | YDR077 | +                         | Major stress-induced structural GPI-cell wall glycoprotein in stationary-phase cells, associates with translating ribosomes, possible role in mitochondrial genome maintenance; ORF contains two distinct variable minisatellites              |
| SEN2      |                     | YLR105 | +                         | Subunit of the tRNA splicing endonuclease, which is composed of Sen2p, Sen15p, Sen34p, and Sen54p; Sen2p contains the active site for tRNA 5' splice site cleavage and has similarity to Sen34p and to Archaeal tRNA splicing endonuclease     |
| SEO1      |                     | YAL067 | -                         | Putative permease, member of the allantoin transporter subfamily of the major facilitator superfamily; mutation confers resistance to ethionine sulfoxide                                                                                      |
| SER3      |                     | YER081 | +                         | 3-phosphoglycerate dehydrogenase, catalyzes the first step in serine and glycine biosynthesis; isozyme of Ser33p                                                                                                                               |
| SFA1      | ADH5                | YDL168 | +                         | Bifunctional enzyme containing both alcohol dehydrogenase and glutathione-dependent formaldehyde dehydrogenase activities, functions in formaldehyde detoxification and formation of long chain and complex alcohols, regulated by Hog1p-Sko1p |
| SFK1      |                     | YKL051 | +                         | Plasma membrane protein that may act together with or upstream of Stt4p to generate normal levels of the essential phospholipid PI4P, at least partially mediates proper localization of Stt4p to the plasma membrane                          |
| SHE2      |                     | YKL130 | +                         | RNA-binding protein that binds specific mRNAs and interacts with She3p; part of the mRNA localization machinery that restricts accumulation of certain proteins to the bud                                                                     |
| SHE9      | MDM33               | YDR393 | -                         | Mitochondrial inner membrane protein required for normal mitochondrial morphology, may be involved in fission of the inner membrane; forms a homo-oligomeric complex                                                                           |
| SHG1      | CPS15               | YBR258 | -                         | Subunit of the COMPASS (Set1C) complex, which methylates histone H3 on lysine 4 and is required in transcriptional silencing near telomeres                                                                                                    |
| SHU2      |                     | YDR078 | +                         | Protein of unassigned function involved in mutation suppression, important for error-free repair of spontaneous and induced DNA lesions to protect the genome from mutation; associates with Shu1p, Psy3p, and Csm2p                           |

| Gene Name | Alternate Gene Name | ORF    | Up + or Down - regulation | Gene Description                                                                                                                                                                                                                                  |
|-----------|---------------------|--------|---------------------------|---------------------------------------------------------------------------------------------------------------------------------------------------------------------------------------------------------------------------------------------------|
| SIP18     |                     | YMR175 | +                         | Protein of unknown function whose expression is induced by osmotic stress                                                                                                                                                                         |
| SKG1      | YKR099C-A           | YKR100 | +                         | Transmembrane protein with a role in cell wall polymer composition; localizes on the inner surface of the plasma membrane at the bud and in the daughter cell                                                                                     |
| SMC5      |                     | YOL034 | +                         | Structural maintenance of chromosomes (SMC) protein; essential subunit of the Mms21-Smc5-Smc6 complex; required for growth and DNA repair; <i>S. pombe</i> homolog forms a heterodimer with <i>S. pombe</i> Rad18p that is involved in DNA repair |
| SMY1      |                     | YKL079 | +                         | Protein that interacts with Myo2p, proposed to be involved in exocytosis; N-terminal domain is related to the motor domain of kinesins                                                                                                            |
| SNF6      |                     | YHL025 | -                         | Subunit of the SWI/SNF chromatin remodeling complex involved in transcriptional regulation; functions interdependently in transcriptional activation with Snf2p and Snf5p                                                                         |
| SNO2      |                     | YNL334 | -                         | Protein of unknown function, nearly identical to Sno3p; expression is induced before the diauxic shift and also in the absence of thiamin                                                                                                         |
| SNO3      |                     | YFL060 | -                         | Protein of unknown function, nearly identical to Sno2p; expression is induced before the diauxic shift and also in the absence of thiamin                                                                                                         |
| SNO4      | HSP34               | YMR322 | -                         | Possible chaperone and cysteine protease with similarity to <i>E. coli</i> Hsp31 and <i>S. cerevisiae</i> Hsp31p, Hsp32p, and Hsp33p; member of the DJ-1/ThiJ/PfpI superfamily; may have a role in pyridoxine metabolism                          |
| SNU114    | GIN10               | YKL173 | +                         | GTPase component of U5 snRNP involved in mRNA splicing via spliceosome; binds directly to U5 snRNA; proposed to be involved in conformational changes of the spliceosome; similarity to ribosomal translocation factor EF-2                       |
| SNU13     |                     | YEL026 | +                         | RNA binding protein, part of U3 snoRNP involved in rRNA processing, part of U4/U6-U5 tri-snRNP involved in mRNA splicing, similar to human 15.5K protein                                                                                          |
| SNZ2      |                     | YNL333 | -                         | Member of a stationary phase-induced gene family; transcription of SNZ2 is induced prior to diauxic shift, and also in the absence of thiamin in a Thi2p-dependent manner; forms a coregulated gene pair with SNO2; interacts with Thi11p         |
| SNZ3      |                     | YFL059 | -                         | Member of a stationary phase-induced gene family; transcription of SNZ2 is induced prior to diauxic shift, and also in the absence of thiamin in a Thi2p-dependent manner; forms a coregulated gene pair with SNO3                                |
| SPB4      |                     | YFL002 | -                         | Putative ATP-dependent RNA helicase, nucleolar protein required for synthesis of 60S ribosomal subunits at a late step in the pathway; sediments with 66S pre-ribosomes in sucrose gradients                                                      |
| SPL2      |                     | YHR136 | -                         | Protein with similarity to cyclin-dependent kinase inhibitors, overproduction suppresses a plc1 null mutation; green fluorescent protein (GFP)-fusion protein localizes to the cytoplasm in a punctate pattern                                    |
| SPO11     |                     | YHL022 | -                         | Meiosis-specific protein that initiates meiotic recombination by catalyzing the formation of double-strand breaks in DNA via a transesterification reaction; required for homologous chromosome pairing and synaptonemal complex formation        |
| SPO75     |                     | YLL005 | -                         | Meiosis-specific protein of unknown function, required for spore wall formation during sporulation; dispensable for both nuclear divisions during meiosis                                                                                         |

| Gene Name | Alternate Gene Name | ORF    | Up + or Down - regulation | Gene Description                                                                                                                                                                                                                                |
|-----------|---------------------|--------|---------------------------|-------------------------------------------------------------------------------------------------------------------------------------------------------------------------------------------------------------------------------------------------|
| SPS19     | SPX19               | YNL202 | -                         | Peroxisomal 2,4-dienoyl-CoA reductase, auxiliary enzyme of fatty acid beta-oxidation; homodimeric enzyme required for growth and sporulation on petroselineate medium; expression induced during late sporulation and in the presence of oleate |
| SPS22     |                     | YCL048 | -                         | Protein of unknown function, redundant with Sps2p for the organization of the beta-glucan layer of the spore wall                                                                                                                               |
| SPS4      |                     | YOR313 | -                         | Protein whose expression is induced during sporulation; not required for sporulation; heterologous expression in E. coli induces the SOS response that senses DNA damage                                                                        |
| SPT23     |                     | YKL020 | +                         | ER membrane protein involved in regulation of OLE1 transcription, acts with homolog Mga2p; inactive ER form dimerizes and one subunit is then activated by ubiquitin/proteasome-dependent processing followed by nuclear targeting              |
| SRB4      | MED17               | YER022 | -                         | Subunit of the RNA polymerase II mediator complex; associates with core polymerase subunits to form the RNA polymerase II holoenzyme; essential for transcriptional regulation                                                                  |
| SRD1      |                     | YCR018 | -                         | Protein involved in the processing of pre-rRNA to mature rRNA; contains a C2/C2 zinc finger motif; srd1 mutation suppresses defects caused by the rrp1-1 mutation                                                                               |
| SRL3      |                     | YKR091 | +                         | Cytoplasmic protein that, when overexpressed, suppresses the lethality of a rad53 null mutation; potential Cdc28p substrate                                                                                                                     |
| SRM1      | MTR1 PRP20          | YGL097 | -                         | Nucleotide exchange factor for Gsp1p, localizes to the nucleus, required for nucleocytoplasmic trafficking of macromolecules; suppressor of the pheromone response pathway; potentially phosphorylated by Cdc28p                                |
| SRP21     |                     | YKL122 | +                         | Subunit of the signal recognition particle (SRP), which functions in protein targeting to the endoplasmic reticulum membrane; not found in mammalian SRP; forms a pre-SRP structure in the nucleolus that is translocated to the cytoplasm      |
| SRT1      |                     | YMR101 | -                         | Cis-prenyltransferase involved in synthesis of long-chain dolichols (19-22 isoprene units; as opposed to Rer2p which synthesizes shorter-chain dolichols); localizes to lipid bodies; transcription is induced during stationary phase          |
| SRX1      |                     | YKL086 | +                         | Sulfiredoxin, contributes to oxidative stress resistance by reducing cysteine-sulfinic acid groups in the peroxiredoxins Tsa1p and Ahp1p that are formed upon exposure to oxidants; conserved in higher eukaryotes                              |
| SSA3      | YG106               | YBL075 | +                         | ATPase involved in protein folding and the response to stress; plays a role in SRP-dependent cotranslational protein-membrane targeting and translocation; member of the heat shock protein 70 (HSP70) family; localized to the cytoplasm       |
| SSH4      | MLF4                | YKL124 | +                         | Vacuolar protein that presumably functions within the endosomal-vacuolar trafficking pathway, affecting events that determine whether plasma membrane proteins are degraded or routed to the plasma membrane                                    |
| STE24     | AFC1 PIO2           | YJR117 | +                         | Highly conserved zinc metalloprotease that functions in two steps of a-factor maturation, C-terminal CAAX proteolysis and the first step of N-terminal proteolytic processing; contains multiple transmembrane spans                            |

| Gene Name | Alternate Gene Name | ORF    | Up + or Down - regulation | Gene Description                                                                                                                                                                                                                                 |
|-----------|---------------------|--------|---------------------------|--------------------------------------------------------------------------------------------------------------------------------------------------------------------------------------------------------------------------------------------------|
| STE50     |                     | YCL032 | -                         | Protein involved in mating response, invasive/filamentous growth, and osmotolerance, acts as an adaptor that links G protein-associated Cdc42p-Ste20p complex to the effector Ste11p to modulate signal transduction                             |
| STL1      |                     | YDR536 | +                         | Glycerol proton symporter of the plasma membrane, subject to glucose-induced inactivation, strongly but transiently induced when cells are subjected to osmotic shock                                                                            |
| SUC2      |                     | YIL162 | -                         | Invertase, sucrose hydrolyzing enzyme; a secreted, glycosylated form is regulated by glucose repression, and an intracellular, nonglycosylated enzyme is produced constitutively                                                                 |
| SUI1      | MOF2 RFR1           | YNL244 | +                         | Translation initiation factor eIF1; component of a complex involved in recognition of the initiator codon; modulates translation accuracy at the initiation phase                                                                                |
| SWD2      | CPS35 SAF37         | YKL018 | +                         | Subunit of the COMPASS (Set1C) complex, which methylates histone H3 on lys 4 and is involved in telomeric silencing; subunit of CPF (cleavage and polyadenylation factor), a complex involved in RNAP II transcription termination               |
| SWF1      | PSL10               | YDR126 | -                         | Palmitoyltransferase that acts on the SNAREs Snc1p, Syn8p, Tlg1p and likely on all SNAREs; member of a family of putative palmitoyltransferases containing an Asp-His-His-Cys-cysteine rich (DHHC-CRD) domain; may have a role in vacuole fusion |
| SWH1      | OSH1 YAR044W        | YAR042 | -                         | Protein similar to mammalian oxysterol-binding protein; contains ankyrin repeats; localizes to the Golgi and the nucleus-vacuole junction                                                                                                        |
| SYF2      | NTC31               | YGR129 | -                         | Component of the spliceosome complex involved in pre-mRNA splicing; involved in regulation of cell cycle progression                                                                                                                             |
| SYG1      |                     | YIL047 | -                         | Plasma membrane protein of unknown function; truncation and overexpression suppresses lethality of G-alpha protein deficiency                                                                                                                    |
| TAT1      | TAP1 VAP1           | YBR069 | +                         | Amino acid transport protein for valine, leucine, isoleucine, and tyrosine, low-affinity tryptophan and histidine transporter; overexpression confers FK506 and FTY720 resistance                                                                |
| TAT2      | LTG3 SAB2 SCM2 TAP2 | YOL020 | -                         | High affinity tryptophan and tyrosine permease, overexpression confers FK506 and FTY720 resistance                                                                                                                                               |
| TAZ1      |                     | YPR140 | -                         | Lyso-phosphatidylcholine acyltransferase, required for normal phospholipid content of mitochondrial membranes; may remodel acyl groups of cardiolipin in the inner membrane; similar to human tafazzin, which is implicated in Barth syndrome    |
| TCB3      |                     | YML072 | -                         | Lipid-binding protein, localized to the bud via specific mRNA transport; non-tagged protein detected in a phosphorylated state in mitochondria; GFP-fusion protein localizes to the cell periphery; C-termini of Tcb1p, Tcb2p and Tcb3p interact |
| TEF1      | EF-1 alpha          | YPR080 | +                         | Translational elongation factor EF-1 alpha; also encoded by TEF2; functions in the binding reaction of aminoacyl-tRNA (AA-tRNA) to ribosomes                                                                                                     |
| TEF4      | EFC1                | YKL081 | +                         | Translation elongation factor EF-1 gamma                                                                                                                                                                                                         |
| TEM1      |                     | YML064 | +                         | GTP-binding protein of the ras superfamily involved in termination of M-phase; controls actomyosin and septin dynamics during cytokinesis                                                                                                        |
| TEX1      |                     | YNL253 | -                         | Protein involved in mRNA export, component of the transcription export (TREX) complex                                                                                                                                                            |

| Gene Name | Alternate Gene Name | ORF    | Up + or Down - regulation | Gene Description                                                                                                                                                                                                                                |
|-----------|---------------------|--------|---------------------------|-------------------------------------------------------------------------------------------------------------------------------------------------------------------------------------------------------------------------------------------------|
| TFA2      |                     | YKR062 | +                         | TFIIE small subunit, involved in RNA polymerase II transcription initiation                                                                                                                                                                     |
| TFB3      | RIG2                | YDR460 | -                         | Subunit of TFIIF and nucleotide excision repair factor 3 complexes, involved in transcription initiation, required for nucleotide excision repair; ring finger protein similar to mammalian CAK and TFIIF subunit                               |
| TFC3      | FUN24 TS V115       | YAL001 | -                         | Largest of six subunits of the RNA polymerase III transcription initiation factor complex (TFIIIC); part of the TauB domain of TFIIIC that binds DNA at the BoxB promoter sites of tRNA and similar genes; cooperates with Tfc6p in DNA binding |
| TGL2      |                     | YDR058 | -                         | Protein with lipolytic activity towards triacylglycerols and diacylglycerols when expressed in E. coli; role in yeast lipid degradation is unclear                                                                                              |
| TGL4      | STC1                | YKR089 | +                         | Triacylglycerol lipase involved in triacylglycerol mobilization and degradation; found in lipid particles; potential Cdc28p substrate                                                                                                           |
| THI12     |                     | YNL332 | -                         | Protein involved in synthesis of the thiamine precursor hydroxymethylpyrimidine (HMP); member of a subtelomeric gene family including THI5, THI11, THI12, and THI13                                                                             |
| THI13     |                     | YDL244 | -                         | Protein involved in synthesis of the thiamine precursor hydroxymethylpyrimidine (HMP); member of a subtelomeric gene family including THI5, THI11, THI12, and THI13                                                                             |
| THI21     |                     | YPL258 | -                         | Hydroxymethylpyrimidine phosphate kinase, involved in the last steps in thiamine biosynthesis; member of a gene family with THI20 and THI22; functionally redundant with Thi20p                                                                 |
| THI4      | ESP35 MO L1         | YGR144 | -                         | Thiazole synthase, catalyzes formation of the thiazole moiety of thiamin pyrophosphate; required for thiamine biosynthesis and for mitochondrial genome stability                                                                               |
| THI5      |                     | YFL058 | -                         | Protein involved in synthesis of the thiamine precursor hydroxymethylpyrimidine (HMP); member of a subtelomeric gene family including THI5, THI11, THI12, and THI13                                                                             |
| THI7      | THI10               | YLR237 | +                         | Plasma membrane transporter responsible for the uptake of thiamine, member of the major facilitator superfamily of transporters; mutation of human ortholog causes thiamine-responsive megaloblastic anemia                                     |
| THI71     | YOR29-22            | YOR071 | -                         | Transporter of thiamine or related compound; shares sequence similarity to Thi7p; proposed to be involved in 5-fluorocytosine sensitivity                                                                                                       |
| THI72     |                     | YOR192 | -                         | Transporter of thiamine or related compound; shares sequence similarity with Thi7p                                                                                                                                                              |
| THR1      |                     | YHR025 | +                         | Homoserine kinase, conserved protein required for threonine biosynthesis; expression is regulated by the GCN4-mediated general amino acid control pathway                                                                                       |
| TIM22     |                     | YDL217 | +                         | Component of the mitochondrial Tim54p-Tim22p complex involved in insertion of polytopic proteins into the inner membrane                                                                                                                        |
| TIP1      |                     | YBR067 | +                         | Major cell wall mannoprotein with possible lipase activity; transcription is induced by heat- and cold-shock; member of the Srp1p/Tip1p family of serine-alanine-rich proteins                                                                  |
| TIS11     | CTH2                | YLR136 | -                         | mRNA-binding protein expressed during iron starvation; binds to a sequence element in the 3'-untranslated regions of specific mRNAs to mediate their degradation; involved in iron homeostasis                                                  |
| TMA19     | MMI1 RBF 18         | YKL056 | +                         | Protein that associates with ribosomes; homolog of translationally controlled tumor protein; green fluorescent protein (GFP)-fusion protein localizes to the cytoplasm and relocates to the mitochondrial outer surface upon oxidative stress   |

| Gene Name | Alternate Gene Name | ORF    | Up + or Down - regulation | Gene Description                                                                                                                                                                                                                        |
|-----------|---------------------|--------|---------------------------|-----------------------------------------------------------------------------------------------------------------------------------------------------------------------------------------------------------------------------------------|
| TMA20     | RBF20               | YER007 | -                         | Protein of unknown function that associates with ribosomes and has a putative RNA binding domain; interacts with Tma22p; null mutant exhibits translation defects; has homology to human oncogene MCT-1                                 |
| TPO5      |                     | YKL174 | +                         | Protein involved in excretion of putrescine and spermidine; putative polyamine transporter in the Golgi or post-Golgi vesicles                                                                                                          |
| TPT1      |                     | YOL102 | -                         | tRNA 2'-phosphotransferase, catalyzes the final step in yeast tRNA splicing: the transfer of the 2'-PO(4) from the splice junction to NAD(+) to form ADP-ribose 1"-2" cyclic phosphate and nicotinamide                                 |
| TRK2      | RPD2                | YKR050 | +                         | Component of the Trk1p-Trk2p potassium transport system                                                                                                                                                                                 |
| TRS31     |                     | YDR472 | +                         | One of 10 subunits of the transport protein particle (TRAPP) complex of the cis-Golgi which mediates vesicle docking and fusion; involved in endoplasmic reticulum (ER) to Golgi membrane traffic                                       |
| TRX3      |                     | YCR083 | +                         | Mitochondrial thioredoxin, highly conserved oxidoreductase required to maintain the redox homeostasis of the cell, forms the mitochondrial thioredoxin system with Trr2p, redox state is maintained by both Trr2p and Glr1p             |
| TUL1      |                     | YKL034 | +                         | Golgi-localized RING-finger ubiquitin ligase (E3), involved in ubiquitinating and sorting membrane proteins that contain polar transmembrane domains to multivesicular bodies for delivery to the vacuole for quality control purposes  |
| TVP38     |                     | YKR088 | +                         | Integral membrane protein localized to late Golgi vesicles along with the v-SNARE Tlg2p; green fluorescent protein (GFP)-fusion protein localizes to the cytoplasm in a punctate pattern                                                |
| TYE7      | SGC1                | YOR344 | -                         | Serine-rich protein that contains a basic-helix-loop-helix (bHLH) DNA binding motif; binds E-boxes of glycolytic genes and contributes to their activation; may function as a transcriptional activator in Ty1-mediated gene expression |
| UBA1      |                     | YKL210 | +                         | Ubiquitin activating enzyme (E1), involved in ubiquitin-mediated protein degradation and essential for viability                                                                                                                        |
| UBC11     |                     | YOR339 | -                         | Ubiquitin-conjugating enzyme most similar in sequence to Xenopus ubiquitin-conjugating enzyme E2-C, but not a true functional homolog of this E2; unlike E2-C, not required for the degradation of mitotic cyclin Clb2                  |
| UBX6      | CUI2                | YJL048 | +                         | UBX (ubiquitin regulatory X) domain-containing protein that interacts with Cdc48p, transcription is repressed when cells are grown in media containing inositol and choline                                                             |
| URA1      |                     | YKL216 | +                         | Dihydroorotate dehydrogenase, catalyzes the fourth enzymatic step in the de novo biosynthesis of pyrimidines, converting dihydroorotic acid into orotic acid                                                                            |
| URA3      |                     | YEL021 | -                         | Orotidine-5'-phosphate (OMP) decarboxylase, catalyzes the sixth enzymatic step in the de novo biosynthesis of pyrimidines, converting OMP into uridine monophosphate (UMP); converts 5-FOA into 5-fluorouracil, a toxic compound        |
| URB1      | NPA1                | YKL014 | -                         | Nucleolar protein required for the normal accumulation of 25S and 5.8S rRNAs, associated with the 27SA2 pre-ribosomal particle; proposed to be involved in the biogenesis of the 60S ribosomal subunit                                  |
| URH1      |                     | YDR400 | -                         | Uridine nucleosidase (uridine-cytidine N-ribohydrolase), cleaves N-glycosidic bonds in nucleosides; involved in the pyrimidine salvage and nicotinamide riboside salvage pathways                                                       |

| Gene Name | Alternate Gene Name | ORF    | Up + or Down - regulation | Gene Description                                                                                                                                                                                                                                     |
|-----------|---------------------|--------|---------------------------|------------------------------------------------------------------------------------------------------------------------------------------------------------------------------------------------------------------------------------------------------|
| URM1      |                     | YIL013 | +                         | Ubiquitin-like protein with weak sequence similarity to ubiquitin; depends on the E1-like activating enzyme Uba4p; molecular function of the Urm1p pathway is unknown, but it is required for normal growth, particularly at high temperature        |
| USE1      | SLT1                | YGL098 | +                         | Essential SNARE protein localized to the ER, involved in retrograde traffic from the Golgi to the ER; forms a complex with the SNAREs Sec22p, Sec20p and Ufe1p                                                                                       |
| UTH1      |                     | YKR042 | +                         | Mitochondrial outer membrane and cell wall localized SUN family member required for mitochondrial autophagy; involved in the oxidative stress response, life span during starvation, mitochondrial biogenesis, and cell death                        |
| UTP11     |                     | YKL099 | +                         | Nucleolar protein, component of the small subunit (SSU) processome containing the U3 snoRNA that is involved in processing of pre-18S rRNA                                                                                                           |
| UTP30     |                     | YKR060 | +                         | Possible U3 snoRNP protein involved in maturation of pre-18S rRNA, based on computational analysis of large-scale protein-protein interaction data                                                                                                   |
| VAC7      |                     | YNL054 | -                         | Integral vacuolar membrane protein involved in vacuole inheritance and morphology; activates Fab1p kinase activity under basal conditions and also after hyperosmotic shock                                                                          |
| VAN1      | LDB13 VRG7 VRG8     | YML115 | -                         | Component of the mannan polymerase I, which contains Van1p and Mnn9p and is involved in the first steps of mannan synthesis; mutants are vanadate-resistant                                                                                          |
| VAR1      | VARI                | Q0140  | -                         | Mitochondrial ribosomal protein of the small subunit, mitochondrially-encoded; polymorphic in different strains due to variation in number of AAT (asparagine) codons; translated near the mitochondrial inner membrane                              |
| VIP1      |                     | YLR410 | -                         | Inositol hexakisphosphate (IP6) and inositol heptakisphosphate (IP7) kinase; generation of IP7 by Vip1p is important for phosphate signaling; likely involved in cortical actin cytoskeleton function, by analogy with <i>S. pombe</i> ortholog asp1 |
| VPH2      | CLS10 VMA12         | YKL117 | +                         | Integral membrane protein required for vacuolar H <sup>+</sup> -ATPase (V-ATPase) function, although not an actual component of the V-ATPase complex; functions in the assembly of the V-ATPase; localized to the endoplasmic reticulum (ER)         |
| XRS2      |                     | YDR369 | +                         | Protein required for DNA repair; component of the Mre11 complex, which is involved in double strand breaks, meiotic recombination, telomere maintenance, and checkpoint signaling                                                                    |
| XYL2      |                     | YLR070 | -                         | Xylitol dehydrogenase, converts xylitol to D-xylulose in the endogenous xylose utilization pathway                                                                                                                                                   |
| YAP3      |                     | YHL009 | -                         | Basic leucine zipper (bZIP) transcription factor                                                                                                                                                                                                     |
| YAT1      |                     | YAR035 | -                         | Outer mitochondrial carnitine acetyltransferase, minor ethanol-inducible enzyme involved in transport of activated acyl groups from the cytoplasm into the mitochondrial matrix; phosphorylated                                                      |
| YAT2      |                     | YER024 | -                         | Carnitine acetyltransferase; has similarity to Yat1p, which is a carnitine acetyltransferase associated with the mitochondrial outer membrane                                                                                                        |
| YCT1      |                     | YLL055 | -                         | High-affinity cysteine-specific transporter with similarity to the Dal5p family of transporters; green fluorescent protein (GFP)-fusion protein localizes to the endoplasmic reticulum; YCT1 is not an essential gene                                |



| Gene Name | Alternate Gene Name | ORF    | Up + or Down - regulation | Gene Description                                                                                                                                                                                                                               |
|-----------|---------------------|--------|---------------------------|------------------------------------------------------------------------------------------------------------------------------------------------------------------------------------------------------------------------------------------------|
| YEF3      | TEF3                | YLR249 | -                         | Translational elongation factor 3, stimulates the binding of aminoacyl-tRNA (AA-tRNA) to ribosomes by releasing EF-1 alpha from the ribosomal complex; contains two ABC cassettes; binds and hydrolyses ATP                                    |
| YET1      |                     | YKL065 | +                         | Endoplasmic reticulum transmembrane protein; may interact with ribosomes, based on co-purification experiments; homolog of human BAP31 protein                                                                                                 |
| YKT6      |                     | YKL196 | +                         | Vesicle membrane protein (v-SNARE) with acyltransferase activity; involved in trafficking to and within the Golgi, endocytic trafficking to the vacuole, and vacuolar fusion; membrane localization due to prenylation at the carboxy-terminus |
| YKU80     | HDF2                | YMR106 | -                         | Subunit of the telomeric Ku complex (Yku70p-Yku80p), involved in telomere length maintenance, structure and telomere position effect; relocates to sites of double-strand cleavage to promote nonhomologous end joining during DSB repair      |
| YPS5      |                     | YGL259 | -                         | Protein with similarity to GPI-anchored aspartic proteases such as Yap1p and Yap3p                                                                                                                                                             |
| YPT52     |                     | YKR014 | +                         | GTPase, similar to Ypt51p and Ypt53p and to mammalian rab5; required for vacuolar protein sorting and endocytosis                                                                                                                              |
| YRA2      |                     | YKL214 | +                         | Member of the REF (RNA and export factor binding proteins) family; when overexpressed, can substitute for the function of Yra1p in export of poly(A)+ mRNA from the nucleus                                                                    |
| YRF1-1    | YRF1                | YDR545 | -                         | Helicase encoded by the Y' element of subtelomeric regions, highly expressed in the mutants lacking the telomerase component TLC1; potentially phosphorylated by Cdc28p                                                                        |
| YRF1-2    | YRF1                | YER190 | -                         | Helicase encoded by the Y' element of subtelomeric regions, highly expressed in the mutants lacking the telomerase component TLC1; potentially phosphorylated by Cdc28p                                                                        |
| YRF1-3    | YRF1                | YGR296 | -                         | Helicase encoded by the Y' element of subtelomeric regions, highly expressed in the mutants lacking the telomerase component TLC1; potentially phosphorylated by Cdc28p                                                                        |
| YRF1-4    | YRF1                | YLR466 | -                         | Helicase encoded by the Y' element of subtelomeric regions, highly expressed in the mutants lacking the telomerase component TLC1; potentially phosphorylated by Cdc28p                                                                        |
| YRF1-5    | YRF1                | YLR467 | -                         | Helicase encoded by the Y' element of subtelomeric regions, highly expressed in the mutants lacking the telomerase component TLC1; potentially phosphorylated by Cdc28p                                                                        |
| YRF1-6    | YRF1                | YNL339 | -                         | Helicase encoded by the Y' element of subtelomeric regions, highly expressed in the mutants lacking the telomerase component TLC1; potentially phosphorylated by Cdc28p                                                                        |
| YRF1-7    | YRF1                | YPL283 | -                         | Helicase encoded by the Y' element of subtelomeric regions, highly expressed in the mutants lacking the telomerase component TLC1; potentially phosphorylated by Cdc28p                                                                        |
| YRO2      |                     | YBR054 | -                         | Putative protein of unknown function; the authentic, non-tagged protein is detected in a phosphorylated state in highly purified mitochondria in high-throughput studies; transcriptionally regulated by Haa1p                                 |
| YSP3      |                     | YOR003 | -                         | Putative precursor to the subtilisin-like protease III                                                                                                                                                                                         |
| YSR3      | LBP2                | YKR053 | +                         | Dihydrosphingosine 1-phosphate phosphatase, membrane protein involved in sphingolipid metabolism; has similarity to Lcb3p                                                                                                                      |
| YTM1      |                     | YOR272 | +                         | Constituent of 66S pre-ribosomal particles, required for maturation of the large ribosomal subunit                                                                                                                                             |
| ZRG17     |                     | YNR039 | -                         | Endoplasmic reticulum protein of unknown function, transcription is induced under conditions of zinc deficiency; mutant phenotype suggests a role in uptake of zinc                                                                            |

| Gene Name | Alternate Gene Name | ORF    | Up + or Down - regulation | Gene Description                                                                                                                                                           |
|-----------|---------------------|--------|---------------------------|----------------------------------------------------------------------------------------------------------------------------------------------------------------------------|
| ZRT3      |                     | YKL175 | +                         | Vacuolar membrane zinc transporter, transports zinc from storage in the vacuole to the cytoplasm when needed; transcription is induced under conditions of zinc deficiency |
